# Supplementary material for: Self-assembled molecular network with waterwheel-like architecture: experimental and theoretical evaluation toward electron transport capabilities for optoelectronic devices
Source: Royal Society of Chemistry journal article supplement (doi:10.1039/d4cp00390j), 2024-01-01
Supplement: d4cp00390j1.pdf [file d4cp00390j1.pdf]

## Supporting Information

### Self-Assembled Molecular Network with Waterwheel-like Architecture: Experimental and Theoretical Evaluation toward Electron Transport Capabilities for Optoelectronic Devices

Krishan Kumar,<sup>a,\*</sup> Anirban Karmakar,<sup>b</sup> Diksha Thakur,<sup>a</sup> Dipanshu Sharma,<sup>c</sup> Feng-Rong  
Chen<sup>c</sup>, Varsha Verma,<sup>a</sup> Mangey Ram Nagar,<sup>c</sup> Jwo-Huei Jou<sup>c,\*</sup>, Subrata Banik,<sup>d,\*</sup> Subrata  
Ghosh,<sup>a,\*</sup>

<sup>a</sup> *School of Chemical Sciences, IIT Mandi, Himachal Pradesh 175005, India.*

<sup>b</sup> *Centro de Química Estrutural, Instituto Superior Técnico, Avenida Rovisco Pais, 1049-001,  
Lisboa, Portugal*

<sup>c</sup> *Department of Materials Science and Engineering, National Tsing Hua University 101, Sec.  
2, Guang-Fu Road, Hsinchu 30013, Taiwan, R.O.C.*

<sup>d</sup> *Department of Chemistry, School of Chemical and Biotechnology, SASTRA Deemed  
University, Thanjavur 613401, Tamil Nadu, India.*

*Corresponding Authors:*

*K.Kumar, Email: [krishanme906@gmail.com](mailto:krishanme906@gmail.com)*

*J.-H. Jou, Email: [jjou@mx.nthu.edu.tw](mailto:jjou@mx.nthu.edu.tw)*

*S. Banik, Email: [subratachem@gmail.com](mailto:subratachem@gmail.com)*

*S. Ghosh, Email: [subrata@iitmandi.ac.in](mailto:subrata@iitmandi.ac.in)*

## General

UV-vis absorption spectra were recorded on a Shimadzu UV-2450 spectrophotometer. Molecules were characterized by NMR spectroscopy on a Jeol EXC NMR spectrometer. Cyclic Voltammetry was performed on the Metrohm Auto lab instrument. The DSC analyses of the three compounds **TCpCN**, **TCmCN**, and **TmCN** were carried out on Mettler Toledo DSC 821 instruments under a nitrogen atmosphere at a scan rate of 10 °C/Min. The DSC analysis of **TpCN** was carried out on a Mettler Toledo DSC 1/700 instrument at a scan rate of 10 °C/min. The TGA analysis of the three compounds **TCpCN**, **TCmCN**, and **TmCN** was investigated on Shimadzu DTG-60 instrument at a heating scan rate of 10 °C/Min. Further, the TGA analysis of **TpCN** was carried out on the NETZSCH STA448 F1 JUPITOR instrument under a nitrogen atmosphere with a scan rate of 10 °C/min. Diffraction study for **TmCN** was done on Agilent Technologies X-ray diffractometer. For the UV-vis studies, 1mg/1ml stock solution was prepared in DCM solvent and experiments were done with 5µM concentration of the solution. The mentioned melting points were measured either from DSC studies or using melting point apparatus (Stone, Staffordshire, ST15 0SA, UK).

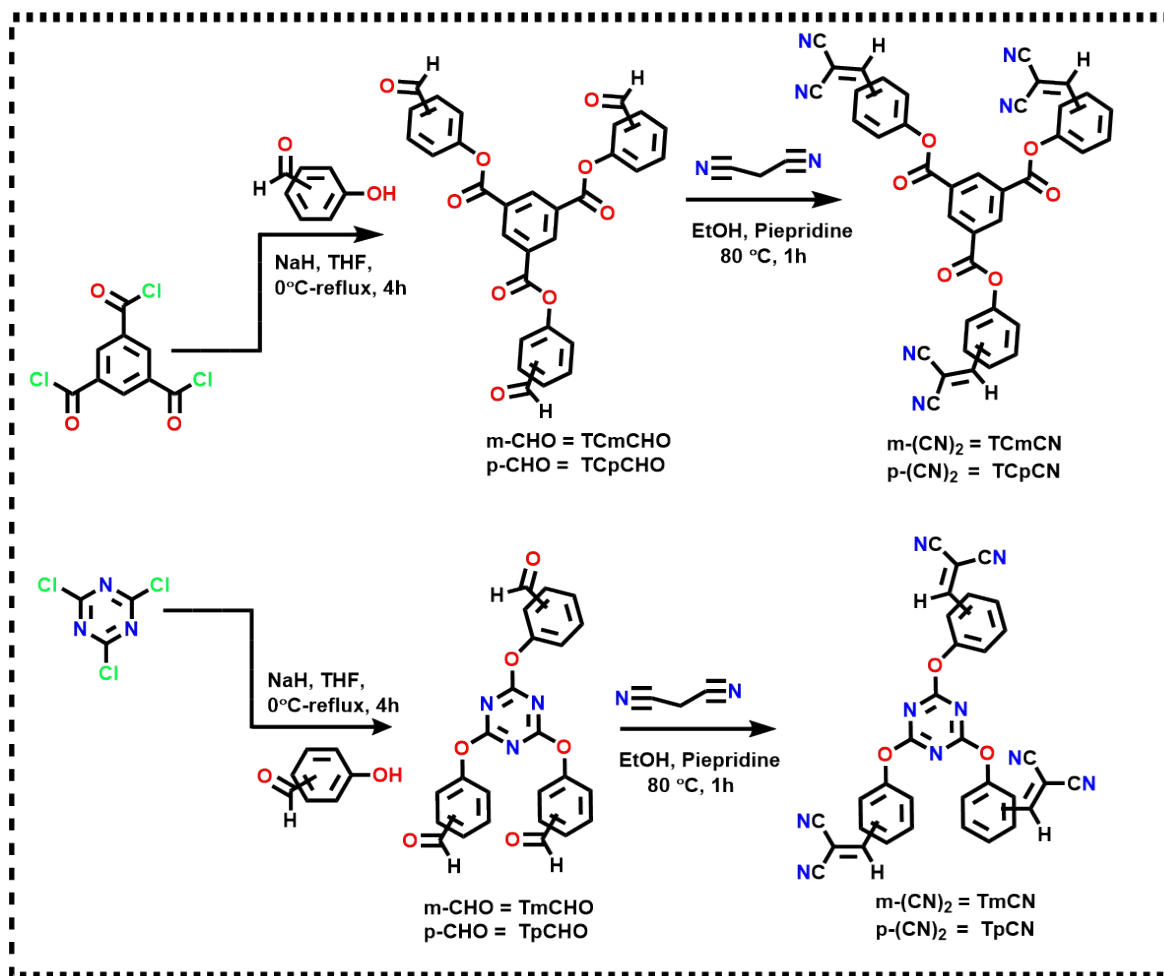

Scheme S1. Synthetic route for TCpCN, TCmCN, TpCN, and TmCN.

## 1. Experimental Section

### *Procedure for the synthesis of TCpCHO*<sup>[1]</sup>

4-Hydroxy benzaldehyde (3.6 eq.) and NaH (3.6 eq.) were added to an anhydrous THF (50 mL) in a round bottom flask at 0°C temperature. Then the reaction mixture was allowed to stir for 20 minutes at the same temperature. After that benzene-1,3,5-tricarbonyl trichloride (1 eq.) in 10 ml THF was added dropwise to the reaction mixture. Then the mixture was refluxed for an additional 4h. After that, the reaction mixture was allowed to come at room temperature and poured into water (50 mL), and extracted with the ethyl acetate. The

resulting crude product was purified by column chromatography (30% ethyl acetate-hexane). Light yellow solid. Yield 60%;  $^1\text{H}$  NMR (500 MHz, DMSO-*d*6): 10.06 (s, 3H), 9.07 (s, 3H), 8.06 (d,  $J = 8.95$  Hz, 6H), 7.64 (d,  $J = 8.95$  Hz, 6H);  $^{13}\text{C}$  NMR (125 MHz, DMSO-*d*6):191.41, 162.13, 154.51, 135.02, 134.14, 130.74, 130.45, 122.32.

*Procedure for the synthesis of TcmCHO*

3-Hydroxy benzaldehyde (3.6 eq.) and NaH (3.6 eq.) were added to anhydrous THF (50 mL) in a round bottom flask at 0°C temperature. Then the reaction mixture was allowed to stir for 20 minutes at the same temperature. After that, benzene-1,3,5-tricarbonyl trichloride (1 eq.) in 10 ml THF was added dropwise to the reaction mixture. Then the mixture was refluxed for an additional 4h. After that, the reaction mixture was allowed to come at the room temperature and poured into water (50 mL) and extracted with the ethyl acetate. The resulting crude product was purified by column chromatography (30% ethyl acetate-hexane). Light yellow solid. Yield 60%;  $^1\text{H}$  NMR (500 MHz, DMSO-*d*6): 10.06 (s, 3H), 9.07 (s, 3H), 7.91-7.92 (m, 6H), 7.74 (d,  $J = 4.85$  Hz, 6H);  $^{13}\text{C}$  NMR (125 MHz, DMSO-*d*6):192.08, 162.68, 150.75, 137.60, 135.14, 130.61, 130.49, 127.80, 127.65, 121.88.

*Procedure for the synthesis of TpCHO* <sup>[2]</sup>

4-Hydroxy benzaldehyde (3.6 eq.) and NaH (3.6 eq.) were added to anhydrous THF (50 mL) in a round bottom flask at 0°C temperature. Then the reaction mixture was allowed to stir for 20 minutes at the same temperature. After that, cyanuric chloride (1eq.) in 10 ml THF was added dropwise to the reaction mixture. Then the mixture was refluxed for an additional 4h. After that, the reaction mixture was allowed to come at room temperature and poured into water (50 mL), and extracted with the ethyl acetate. The resulting crude product was purified by column chromatography (37% ethyl acetate-hexane). White solid. Yield 55%;  $^1\text{H}$  NMR

(500 MHz, CDCl<sub>3</sub>): 9.99 (s, 3H), 7.91 (d, *J* = 6.85 Hz, 6H), 7.32 (d, *J* = 7.55 Hz, 6H); <sup>13</sup>C NMR (125 MHz, CDCl<sub>3</sub>): 190.58, 173.10, 155.56, 134.33, 131.25, 122.11.

*Procedure for the synthesis of TmCHO* <sup>[3]</sup>

3-Hydroxy benzaldehyde (3.6 eq.) and NaH (3.6 eq.) were added to anhydrous THF (50 mL) in a round bottom flask at 0°C temperature. Then the reaction mixture was allowed to stir for 20 minutes at the same temperature. After that, cyanuric chloride (1 eq.) in 10 ml THF was added dropwise to the reaction mixture. Then the mixture was refluxed for an additional 4h. After that, the reaction mixture was allowed to come at room temperature and poured into water (50 mL) and extracted with ethyl acetate. The resulting crude product was purified by column chromatography (37% ethyl acetate-hexane). White solid. Yield 65%; <sup>1</sup>H NMR (500 MHz, DMSO-*d*<sub>6</sub>): 9.97 (s, 3H), 7.80-7.59 (m, 12H); <sup>13</sup>C NMR (125 MHz, DMSO-*d*<sub>6</sub>): 192.19, 172.91, 151.77, 137.57, 130.57, 127.63, 127.54, 121.65.

*Procedure for the synthesis of TCpCN*

TCpCHO (1 eq.) and malononitrile (3.6 eq.) were added to EtOH (20 ml) in a round bottom flask at room temperature. After that, one drop of piperidine was added to the reaction mixture. Then the mixture was refluxed for 1 h at 80 °C. The yellow precipitate was filtered and washed with cold EtOH (3 times). Yellow solid. Yield 65%; <sup>1</sup>H NMR (500 MHz, DMSO-*d*<sub>6</sub>): 9.05 (s, 3H), 8.54 (s, 3H), 8.09 (d, *J* = 8.90 Hz, 6H), 7.65 (d, *J* = 8.25 Hz, 6H); <sup>13</sup>C NMR (125 MHz, DMSO-*d*<sub>6</sub>): 162.00, 160.01, 154.07, 135.11, 131.90, 130.36, 129.10, 122.65, 113.64, 112.67, 81.50; HRMS (ESI): Calculated for C<sub>39</sub>H<sub>18</sub>N<sub>6</sub>O<sub>6</sub>Na [M+Na]<sup>+</sup>: 689.1187, found: 689.1183; M.P: 198 °C (measured from DSC).

*Procedure for the synthesis of TCmCN*

**TCmCHO** (1 eq.) and malononitrile (3.6 eq.) were added to EtOH (20 ml) in a round bottom flask at room temperature. After that, one drop of piperidine was added to the reaction mixture. Then the mixture was refluxed for 1 h at 80 °C. The yellow precipitate was filtered and washed with cold EtOH (3 times). Yellow solid. Yield 70%; <sup>1</sup>H NMR (500 MHz, DMSO-*d*<sub>6</sub>): 9.05 (s, 3H), 8.59 (s, 3H), 7.92-7.95 (m, 6H), 7.76-7.73 (m, 6H); <sup>13</sup>C NMR (125 MHz, DMSO-*d*<sub>6</sub>): 162.47, 160.15, 150.45, 135.21, 132.49, 130.74, 130.47, 128.09, 127.50, 123.27, 113.70, 112.66, 82.97. HRMS (ESI): Calculated for C<sub>39</sub>H<sub>18</sub>N<sub>6</sub>O<sub>6</sub>Na [M+Na]<sup>+</sup>: 689.1187, found: 689.1184; M.P: 195 °C (measured from DSC).

*Procedure for the synthesis of TmCN*

**TmCHO** (1 eq.) and malononitrile (3.6 eq.) were added to EtOH (20 ml) in a round bottom flask at room temperature. After that, one drop of piperidine was added to the reaction mixture. Then the mixture was refluxed for 1 h at 80 °C. The white precipitate was filtered and washed with cold EtOH (3 times). White solid. Yield 65%; <sup>1</sup>H NMR (500 MHz, DMSO-*d*<sub>6</sub>): 8.52 (s, 3H), 7.85 (d, *J* = 7.60 Hz, 3H), 7.72 (s, 3H), 7.66 (t, *J* = 8.25 Hz, 3H), 7.60-7.58 (m, 3H); <sup>13</sup>C NMR (125 MHz, DMSO-*d*<sub>6</sub>): 172.83, 160.16, 151.42, 132.55, 130.84, 128.12, 127.61, 122.93, 113.93, 112.88, 83.09; HRMS (ESI): Calculated for C<sub>33</sub>H<sub>16</sub>N<sub>9</sub>O<sub>3</sub> [M+H]<sup>+</sup>: 586.1376, found: 586.1376; M.P: 211 °C (measured from DSC).

*Procedure for the synthesis of TpCN*

**TpCHO** (1 eq.) and malononitrile (3.6 eq.) were added to EtOH (20 ml) in a round bottom flask at room temperature. After that, one drop of piperidine was added to the reaction mixture. Then the mixture was refluxed for 1 h at 80 °C. The white precipitate was filtered and washed with cold EtOH (3 times). White solid. Yield 60%; <sup>1</sup>H NMR (500 MHz, DMSO-*d*<sub>6</sub>): 8.53 (s, 3H), 7.98 (d, *J* = 8.25 Hz, 6H), 7.51 (d, *J* = 8.25 Hz, 6H); <sup>13</sup>C NMR (125 MHz, DMSO-*d*<sub>6</sub>): 172.62, 160.32, 155.09, 132.25, 129.20, 122.75, 114.14, 113.12, 81.64; HRMS

(ESI): Calculated for  $C_{33}H_{16}N_9O_3$   $[M+H]^+$ : 586.1376, found: 586.1371. M.P: 211 °C (measured using melting point apparatus).

### **Electron-only device fabrication**

Electron-only devices were fabricated with **TmCN**, **TpCN**, **TCpCN**, and **TCmCN** as electron transport layer (ETL). The fabricated devices were comprised of ~125 nm ITO anode layer, ~10 nm ETL, ~1 nm LiF as EIL, and ~100 nm Al cathode layer.

The ITO-coated glass substrate was washed in acetone at 45°C for 30 minutes, 2-propanol at 60°C for 60 minutes (both in an ultrasonic bath), treated in an ozone environment under UV light for 15 minutes, and then used to fabricate the device. After cleaning, the substrate was put into a glove box filled with nitrogen to spin-coat the ETL. Tetrahydrofuran (THF) was used to dissolve the **TmCN**, **TpCN**, **TCpCN**, and **TCmCN** before they were spin-coated onto the specimen at 2,500 rpm for 20 seconds to coat the ETL. After the coating of ETL, the specimen was shifted to the high-vacuum chamber, which has a base pressure of  $\sim 7 \times 10^{-6}$  torr. Thermal evaporation was used to successively deposit the subsequent layers (LiF and Al, respectively). The device's current density was measured using a Keithley 2400 electrometer.

## 2. Computed UV spectra with TD-DFT

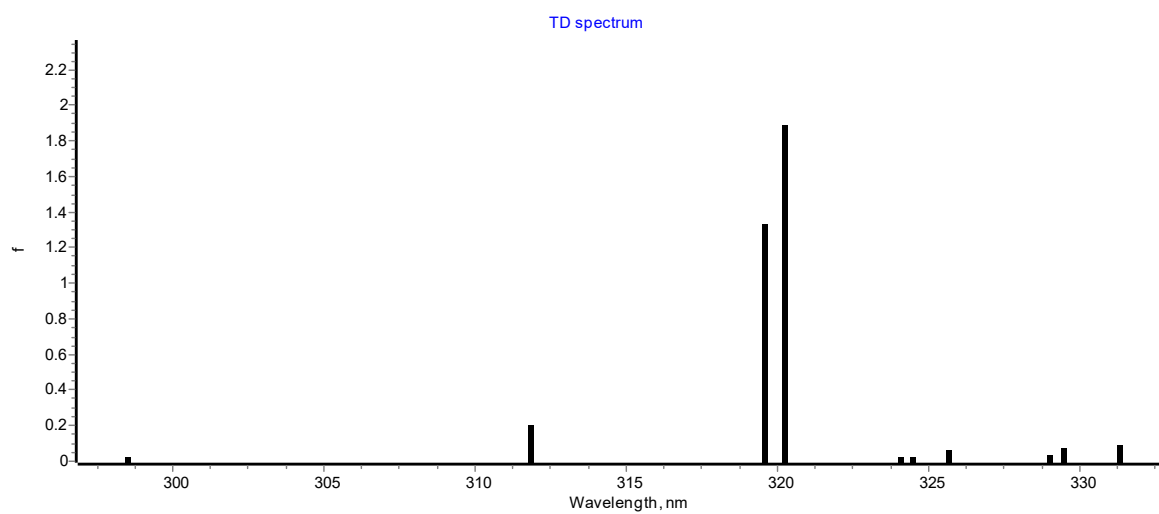

**Figure S1.** Computed UV spectrum with TD-DFT of TCpCN

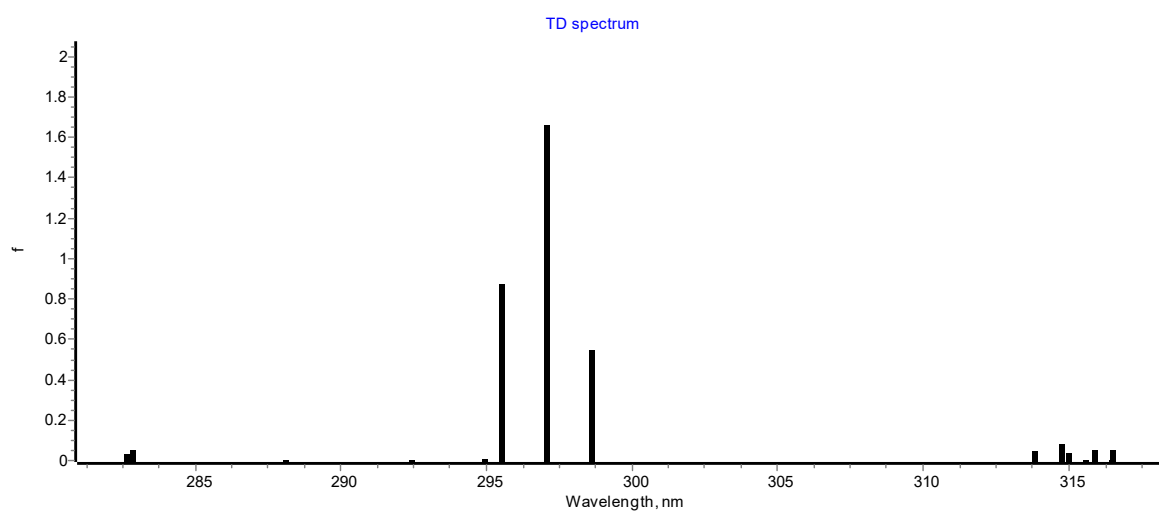

**Fig. S2.** Computed UV spectrum with TD-DFT of TCmCN



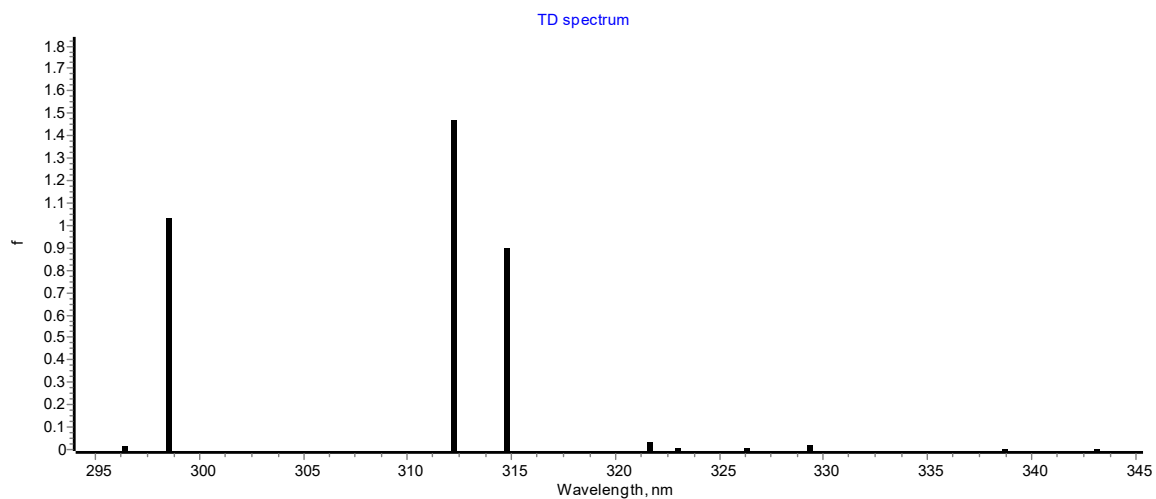

**Fig. S3.** Computed UV spectrum with TD-DFT of **TpCN**

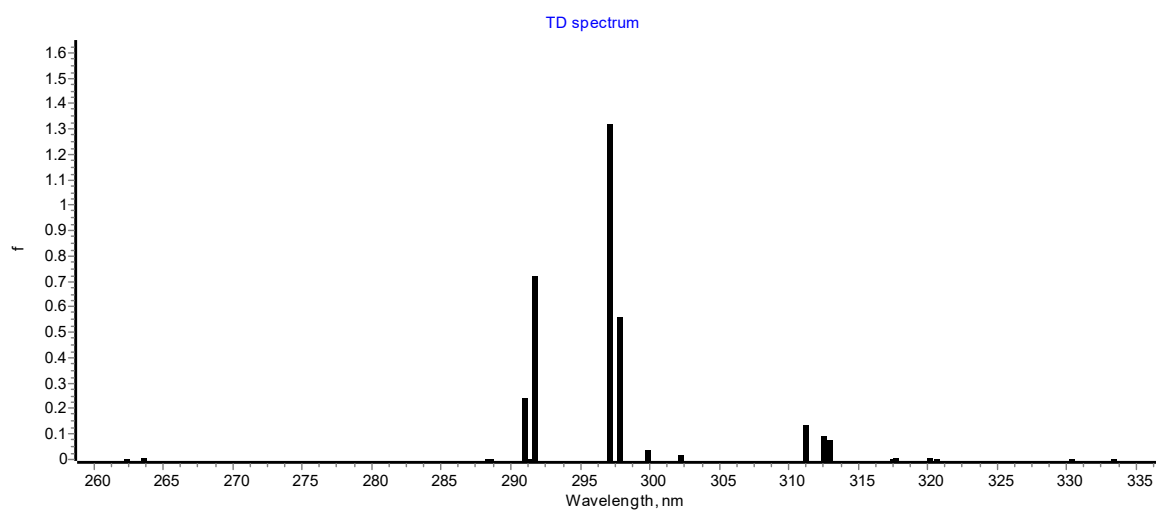

**Fig. S4.** Computed UV spectrum with TD-DFT of **TmCN**

**Table S1.** TD-DFT analysis of **TCpCN**. Oscillator strengths (f) and coefficients >0.20 are tabulated here.

| S.No. | Transition Energy (eV)/Wavelength (nm) | MOs involved             | Coefficients       | f      |
|-------|----------------------------------------|--------------------------|--------------------|--------|
| 1.    | 3.8718/320.22                          | 171 -> 173<br>171 -> 174 | 0.24592<br>0.39264 | 1.8941 |
| 2.    | 3.8802 / 319.53                        | 169 -> 172<br>170 -> 174 | 0.24332<br>0.47321 | 1.3298 |
| 3.    | 3.9763 / 311.81                        | 169 -> 174<br>170 -> 172 | 0.44488<br>0.29417 | 0.2020 |

**Table S2.** TD-DFT analysis of **TCmCN**. Oscillator strengths (f) and coefficients >0.20 are tabulated here.

| S.No. | Transition Energy (eV)/Wavelength (nm) | MOs involved                           | Coefficients                  | f      |
|-------|----------------------------------------|----------------------------------------|-------------------------------|--------|
| 1.    | 4.1521 / 298.61                        | 169 -> 172                             | 0.44335                       | 0.5446 |
| 2.    | 4.1740 / 297.04                        | 169 -> 172<br>170 -> 173               | 0.30382<br>0.36154            | 1.6614 |
| 3.    | 4.1962 / 295.47                        | 169 -> 172<br>170 -> 173<br>171 -> 174 | 0.23620<br>0.24687<br>0.45325 | 0.8726 |

**Table S3.** TD-DFT analysis of **TpCN**. Oscillator strengths (f) and coefficients >0.20 are tabulated here.

| S.No. | Transition Energy (eV)/Wavelength (nm) | MOs involved                        | Coefficients                  | f      |
|-------|----------------------------------------|-------------------------------------|-------------------------------|--------|
| 1.    | 3.9393 / 314.74                        | 149 ->152                           | 0.51287                       | 0.8963 |
| 2.    | 3.9720 / 312.14                        | 150 ->153                           | 0.45177                       | 1.4733 |
| 3.    | 4.1543 / 298.45                        | 148 ->151<br>149 ->152<br>150 ->153 | 0.42844<br>0.32161<br>0.25762 | 1.0298 |

**Table S4.** TD-DFT analysis of **TmCN**. Oscillator strengths (f) and coefficients >0.20 are tabulated here.

| S.No. | Transition<br>Energy(eV)/Wavelength<br>(nm) | MOs involved                                     | Coefficients                             | f      |
|-------|---------------------------------------------|--------------------------------------------------|------------------------------------------|--------|
| 1.    | 4.1638 / 297.77                             | 149 ->153<br>150 ->152                           | 0.37561<br>0.30735                       | 0.5567 |
| 2.    | 4.1751 / 296.96                             | 148 ->151                                        | 0.35407                                  | 1.3203 |
| 3.    | 4.2519 / 291.60                             | 147 ->152<br>148 ->151<br>149 ->152<br>150 ->153 | 0.22479<br>0.33137<br>0.21316<br>0.26469 | 0.7205 |

**Table S5.** Charge transfer distances and magnitude of charge transfer for all the compounds computed using wB97XD functional and 6-311G(d,p) basis set.

| Molecule     | S <sub>1</sub>      |                 | S <sub>2</sub>      |                 | T <sub>1</sub>      |                 | T <sub>2</sub>      |                 |
|--------------|---------------------|-----------------|---------------------|-----------------|---------------------|-----------------|---------------------|-----------------|
|              | D <sub>CT</sub> (Å) | Q <sub>CT</sub> |
| <b>TCmCN</b> | 1.45                | 0.45            | 1.28                | 0.44            | 0.31                | 0.39            | 0.32                | 0.40            |
| <b>TCpCN</b> | 1.00                | 0.45            | 0.44                | 0.45            | 0.23                | 0.41            | 0.22                | 0.41            |
| <b>TpCN</b>  | 1.21                | 0.43            | 0.68                | 0.43            | 0.33                | 0.39            | 0.32                | 0.39            |
| <b>TmCN</b>  | 0.92                | 0.45            | 1.07                | 0.44            | 0.25                | 0.41            | 0.25                | 0.41            |

### 3. Reorganization energy:

The intramolecular electron/hole reorganization energies are very crucial to examine the electron transfer ability of the developed molecules, which were calculated using Nelsen's four-point formula<sup>4-8</sup> equations as depicted below:

$$\lambda_h = \lambda_1 + \lambda_2$$

$$\lambda_1 = E^+(M^0) - E^+(M^+)$$

$$\lambda_2 = E^0(M^+) - E^0(M^0)$$

$$\lambda_e = \lambda_3 + \lambda_4$$

$$\lambda_3 = E^-(M^0) - E^-(M^-)$$

$$\lambda_4 = E^0(M^-) - E^0(M^0)$$

where <sup>4-8</sup>

- (a)  $E^+(M^+)$  belongs to the energy of the cation set at its optimized geometry of  $M^+$  and  $E^0(M^0)$  belongs to the energy of the neutral set.
- (b)  $E^-(M^-)$  belongs to the energy of anion set and  $E^0(M^-)$  belongs to the energy of neutral sets at its optimized geometry  $M^-$ .
- (c)  $E^-(M^0)$  belongs to the energies of the anion set at its optimized geometry  $M^0$  and  $E^0(M^+)$  is the energy of the neutral set at its optimized geometries of  $M^+$ .
- (d)  $E^+(M^0)$  is the energy of the cation set at the optimized geometries of  $M^0$ .

#### 4. Cyclic Voltammetry

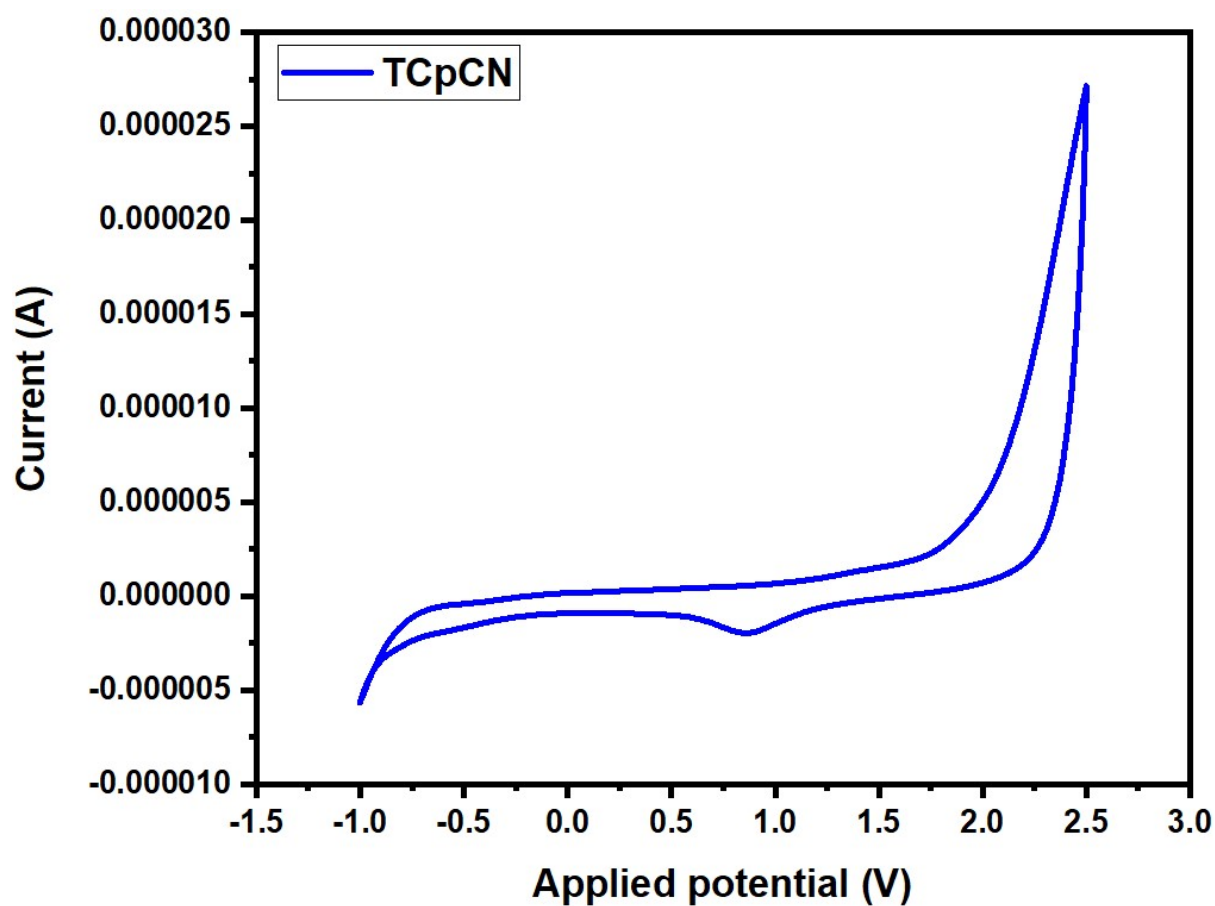

**Fig. S5.** Cyclic voltammetry graph of TCpCN (Ag/AgCl reference electrode, 0.1 M tetrabutylammonium hexafluorophosphate (electrolyte)).

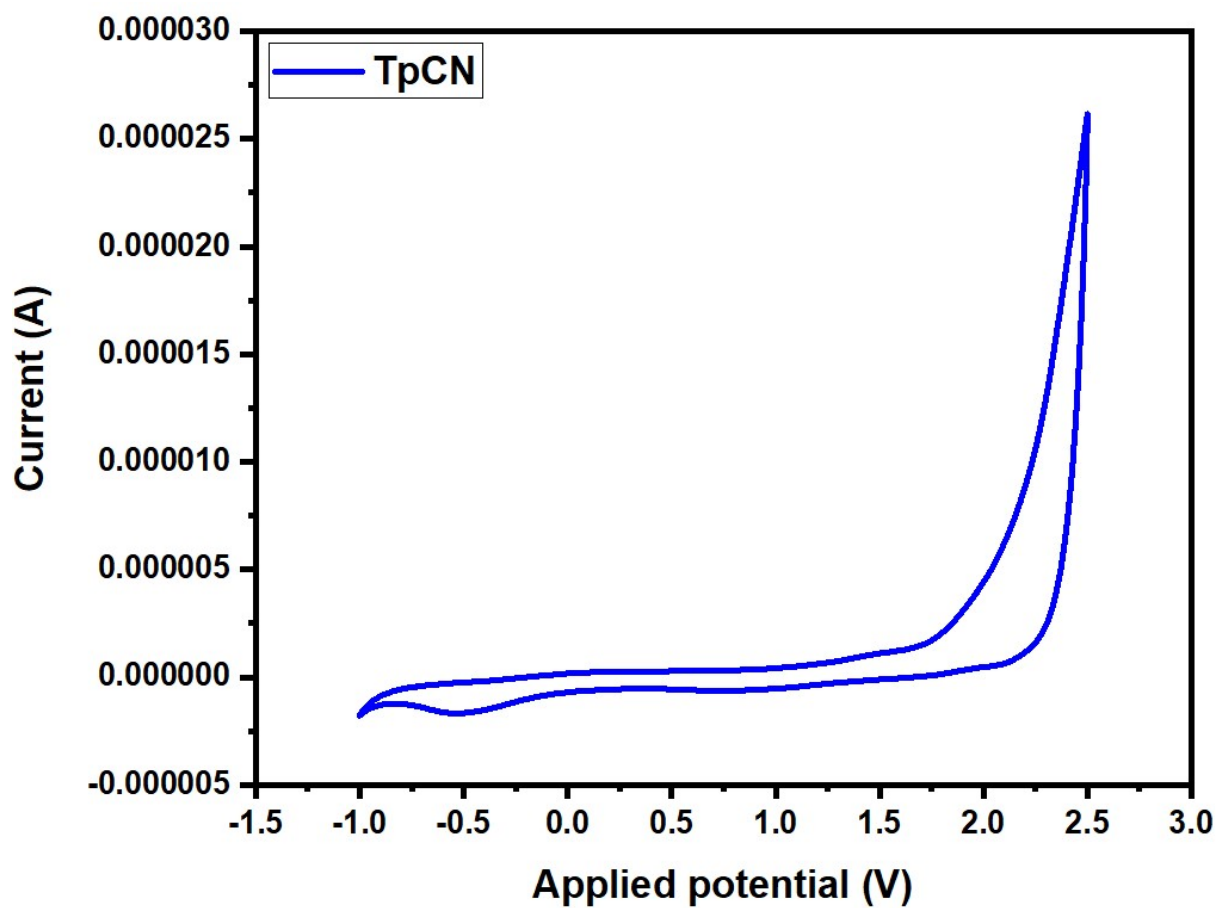

**Fig. S6.** Cyclic voltammetry graph of TpCN (Ag/AgCl reference electrode, 0.1 M tetrabutylammonium hexafluorophosphate (electrolyte)).



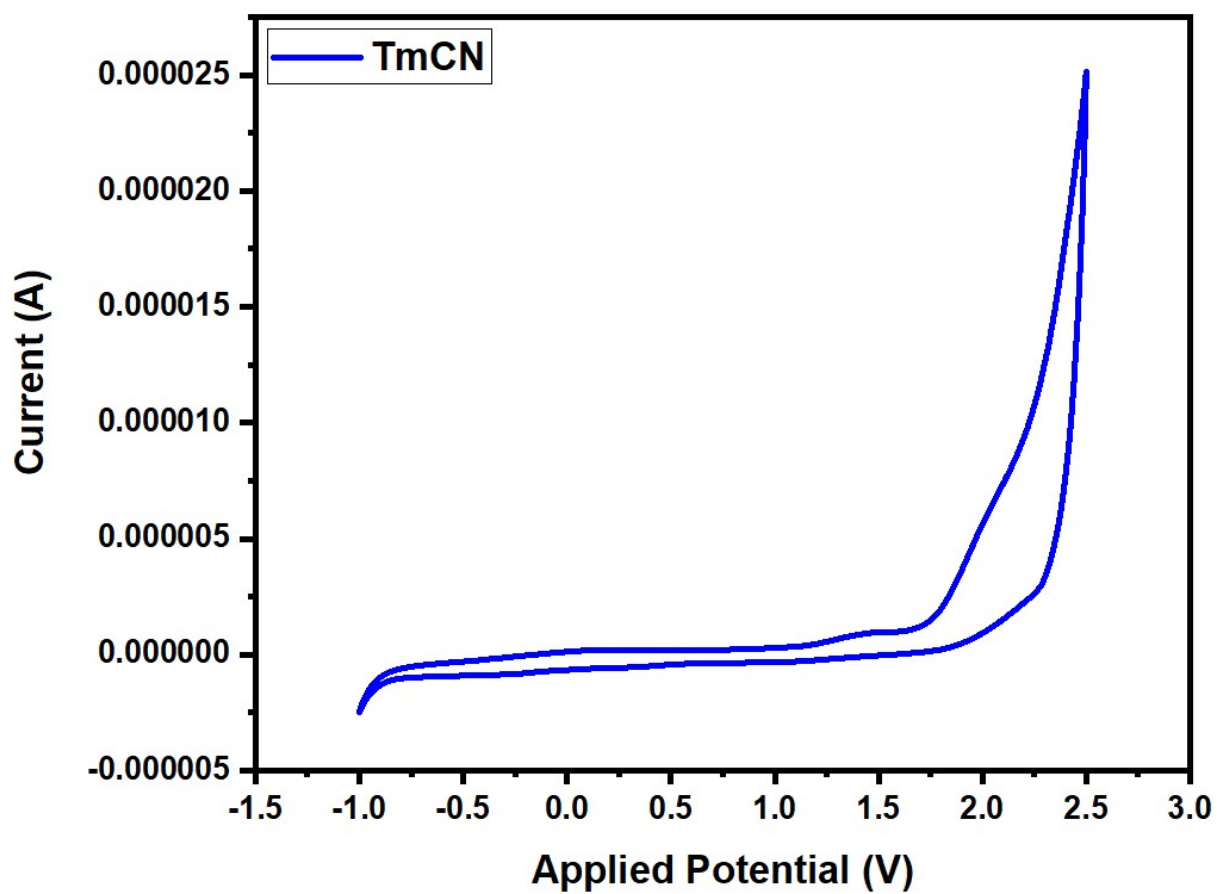

**Fig. S7.** Cyclic voltammetry graph of **TmCN** (Ag/AgCl reference electrode, 0.1 M tetrabutylammonium hexafluorophosphate (electrolyte)).

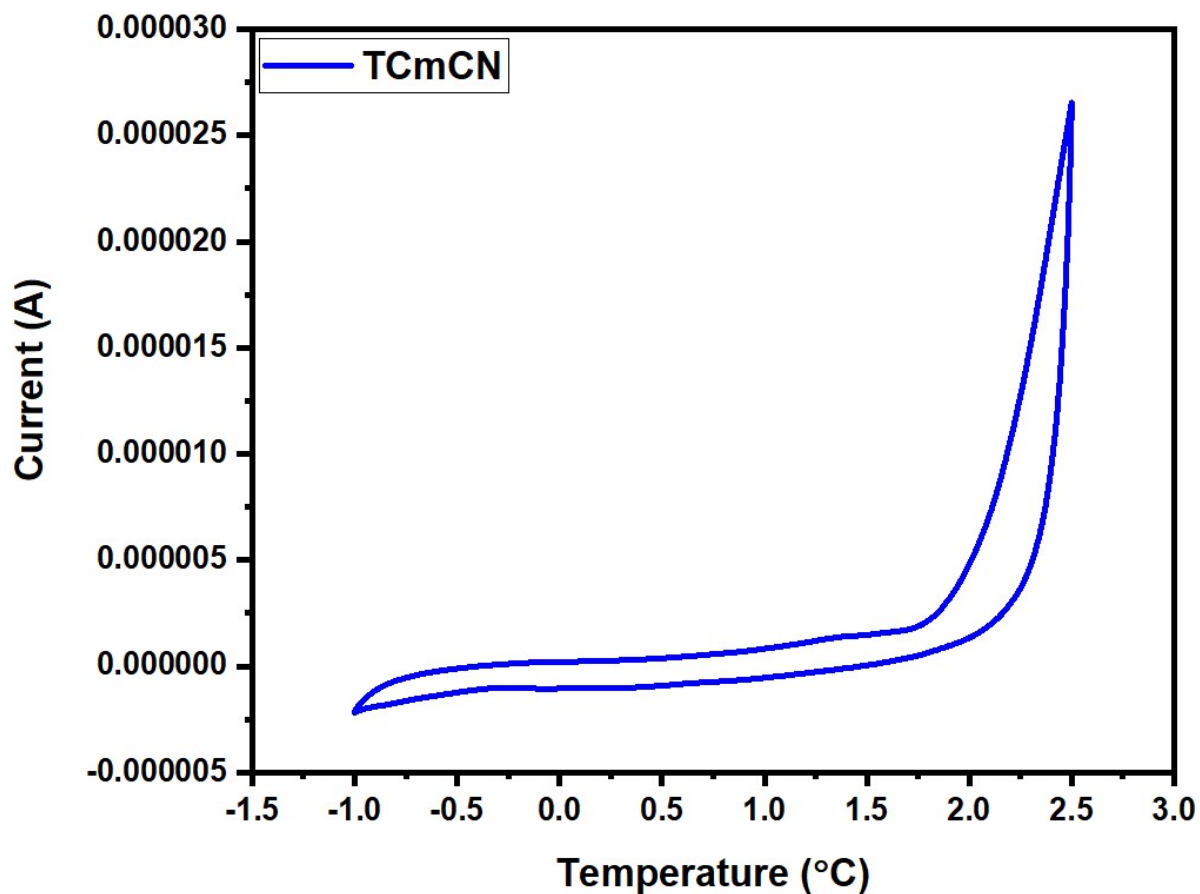

**Fig. S8.** Cyclic voltammetry graph of TCmCN (Ag/AgCl reference electrode, 0.1 M tetrabutylammonium hexafluorophosphate (electrolyte)).

## 5. TGA analysis

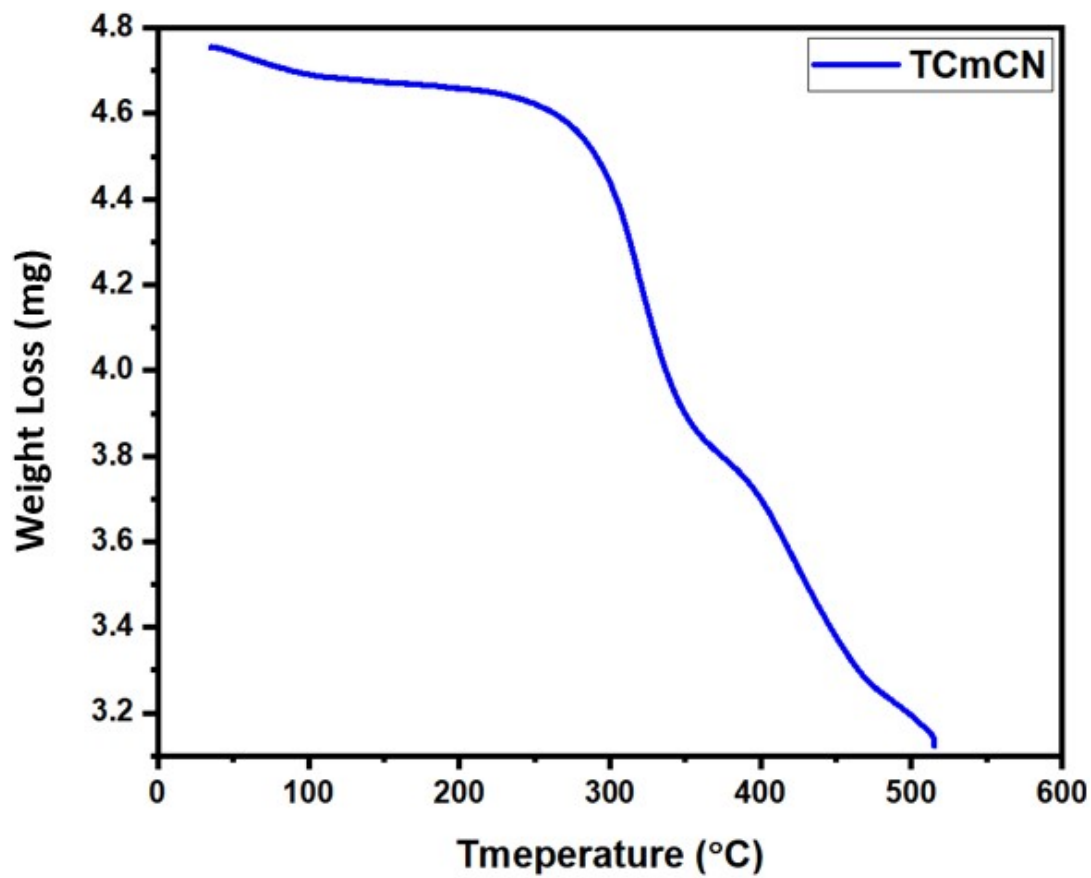

Fig. S9. TGA graph of TCmCN.

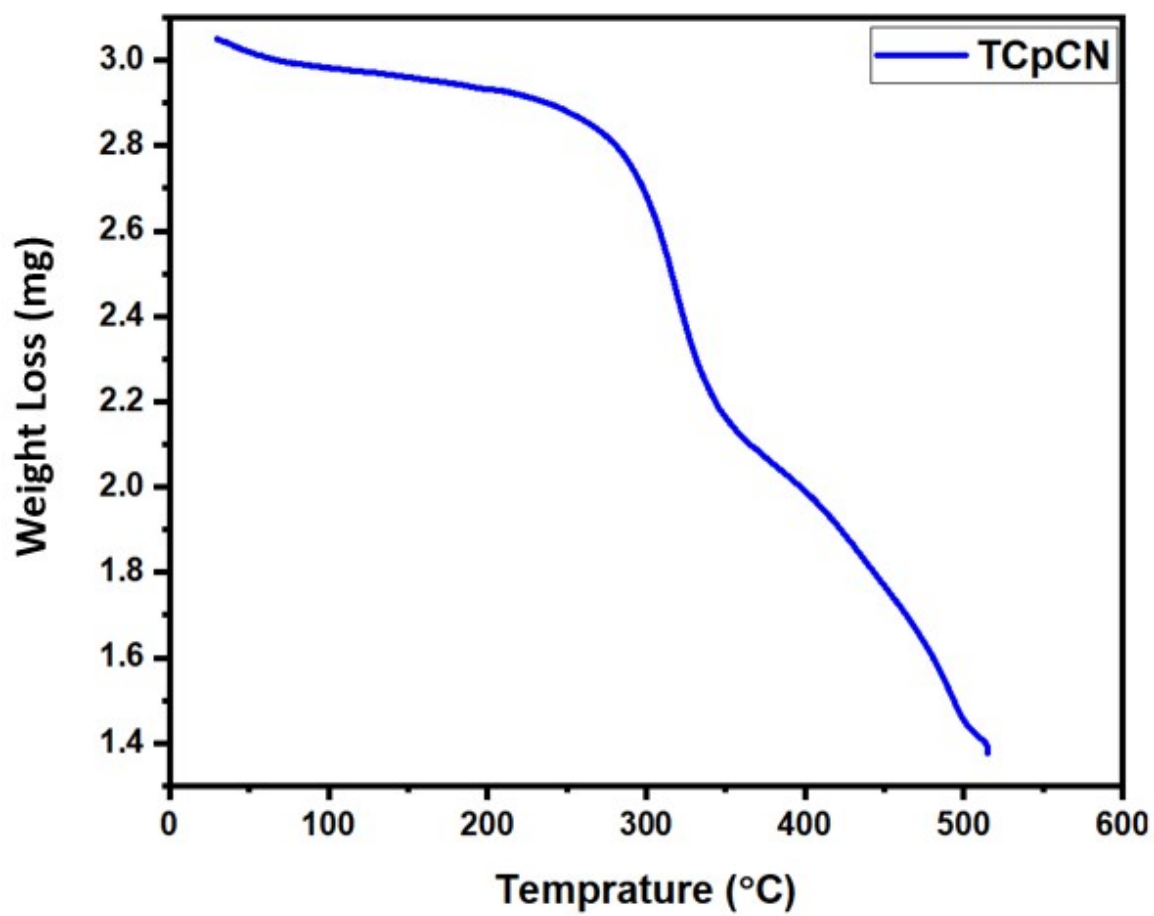

Fig. S10. TGA graph of TCpCN.

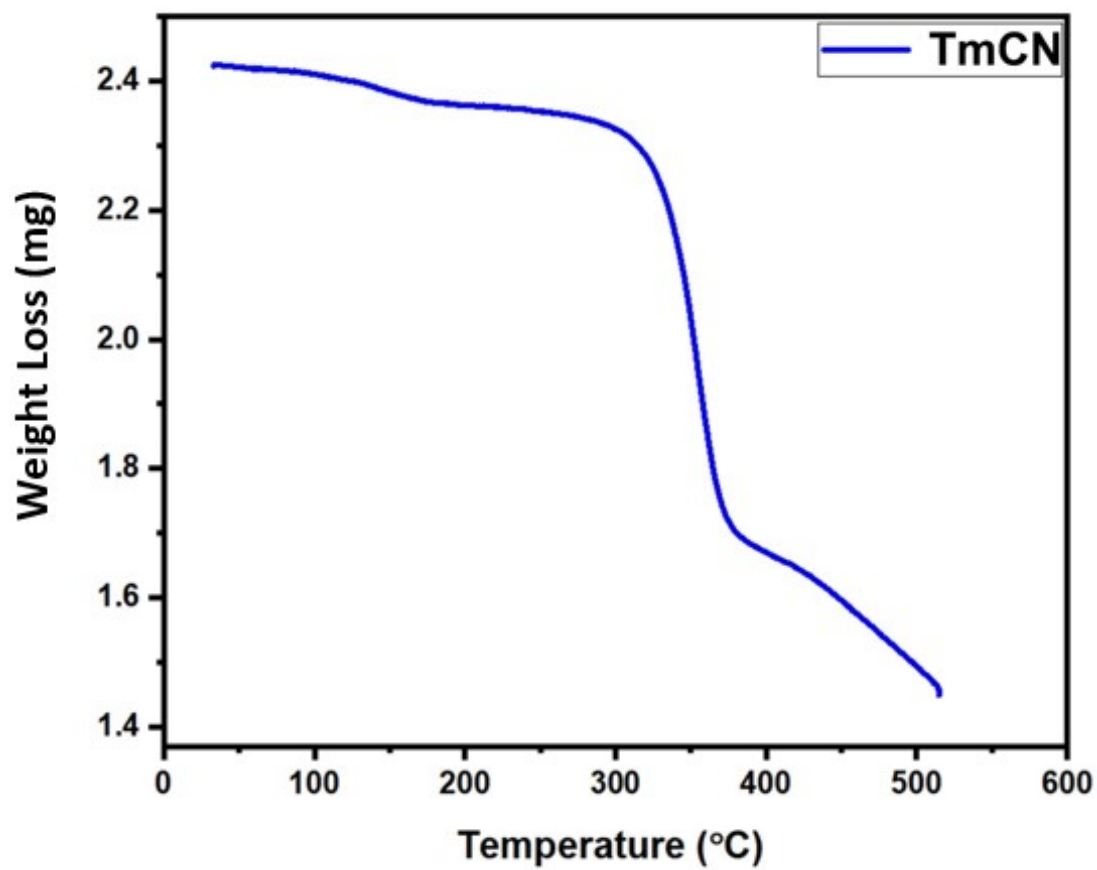

Fig. S11. TGA graph of TmCN.

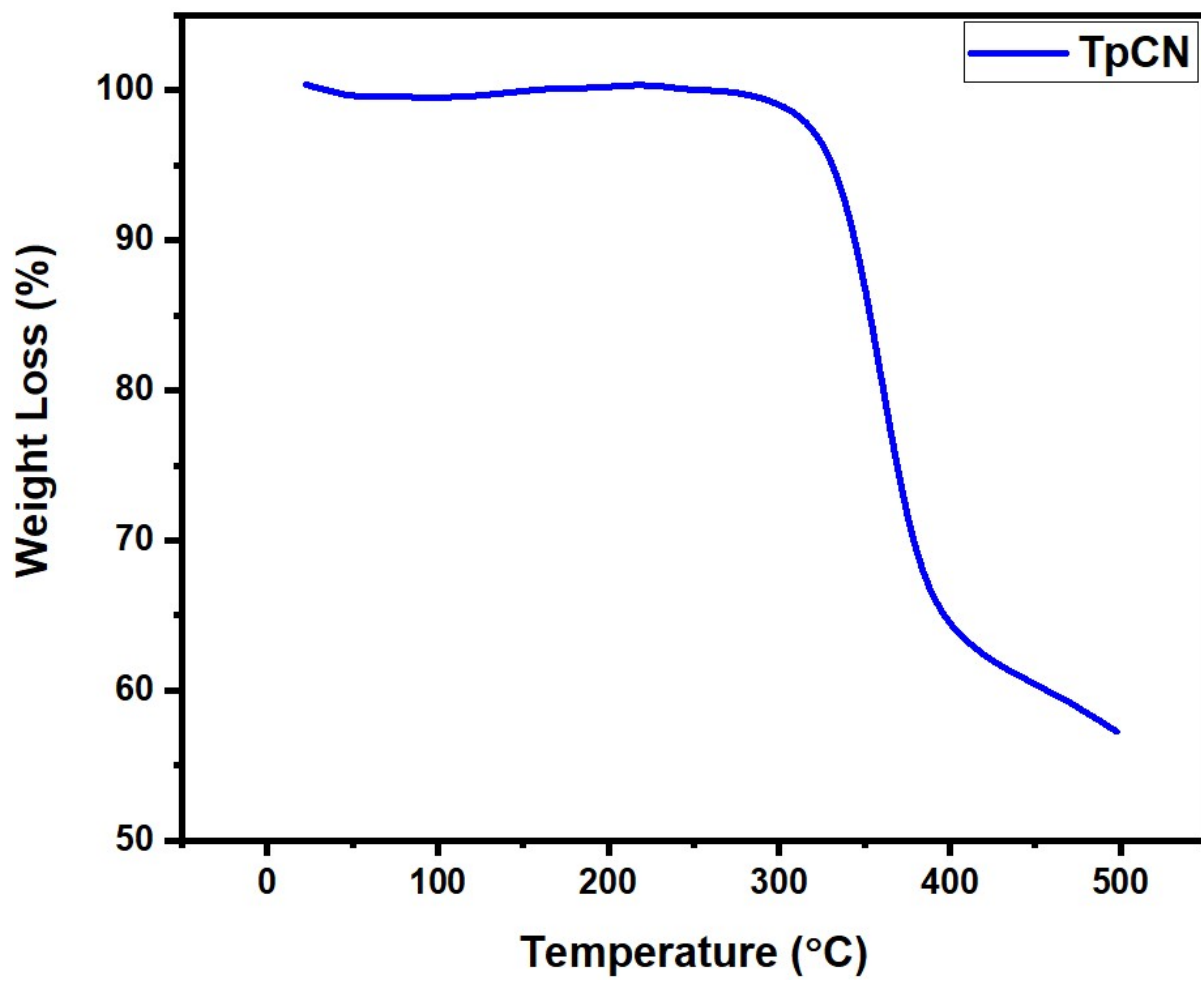

Fig. S12. TGA graph of TpCN.

## 6. DSC analysis:

TCmCN

DSC25,10-04-2023 13:44:25  
1.450 mg  
Tzero Aluminum

C:\ProgramData\TA Instruments\TRIOS\Data\TCmCN.tri

TCmCN

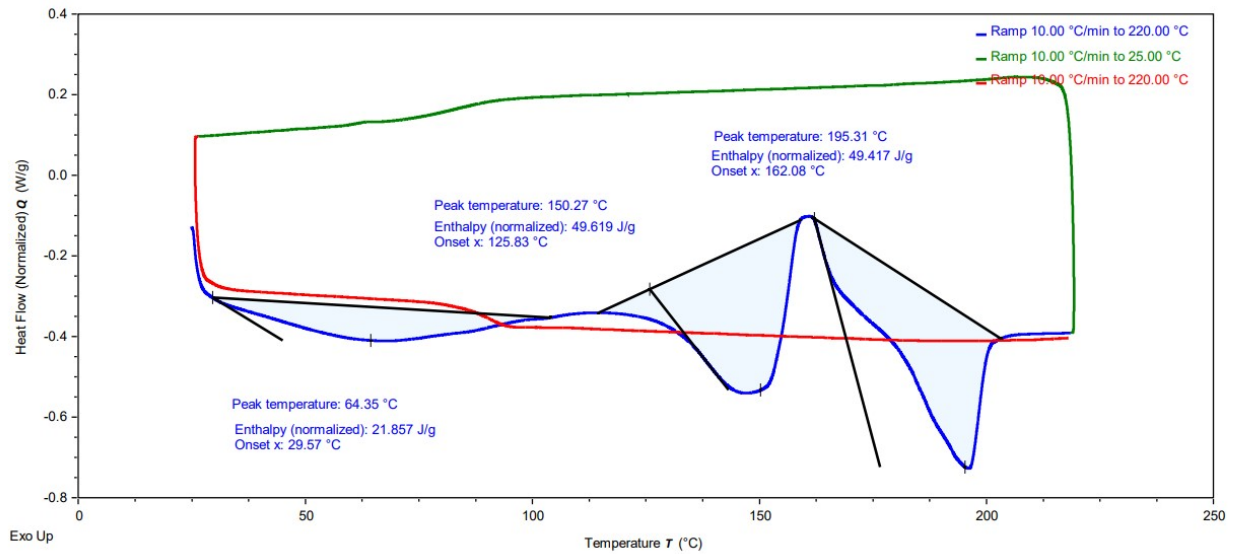

Fig. S13. DSC graph of TCmCN.

TCPCN

DSC25,10-04-2023 15:07:34  
1.850 mg  
Tzero Aluminum

C:\ProgramData\TA Instruments\TRIOS\Data\TCPCN.tri

TCPCN

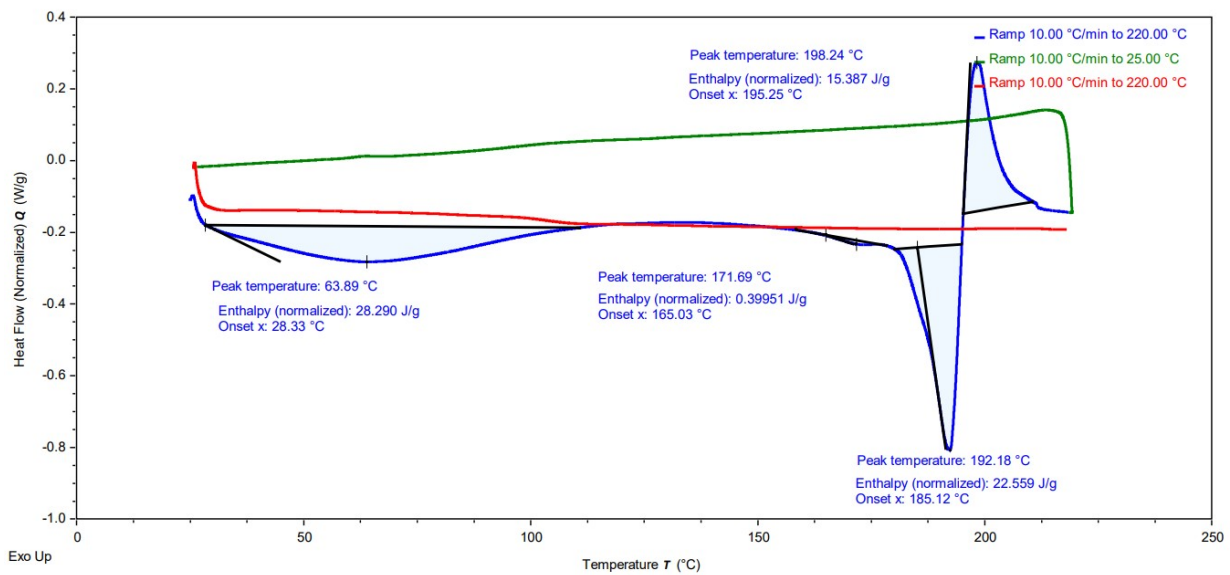

Fig. S14. DSC graph of TCpCN.

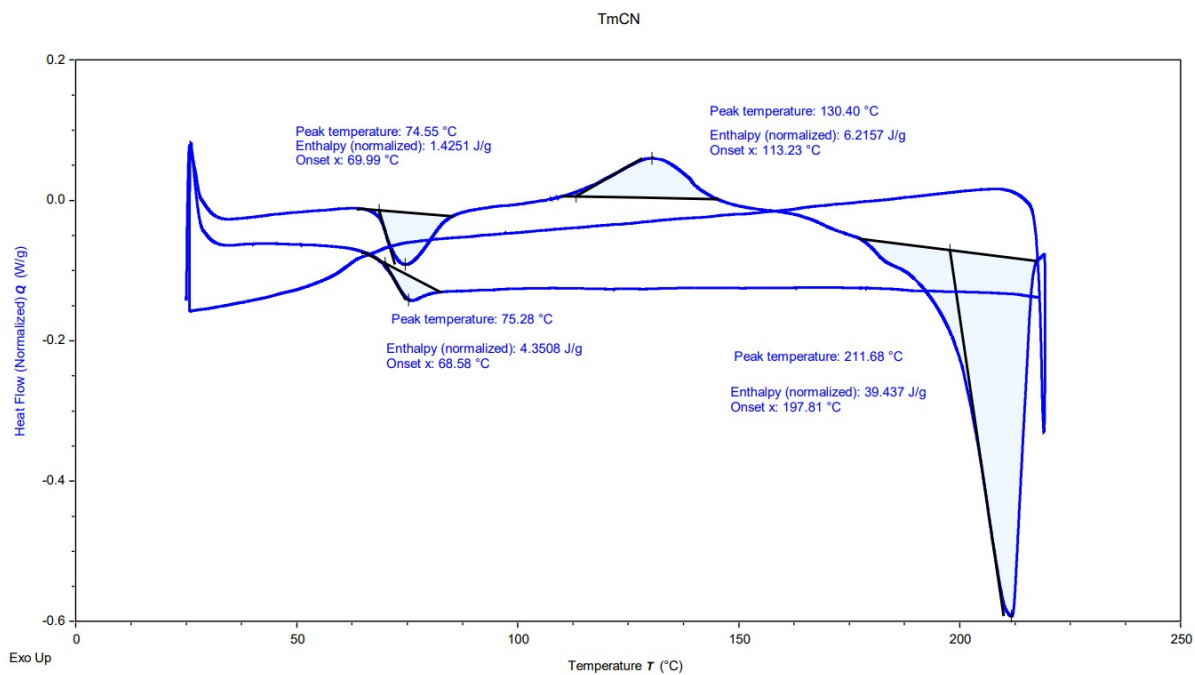

**Fig. S15.** DSC graph of TmCN.

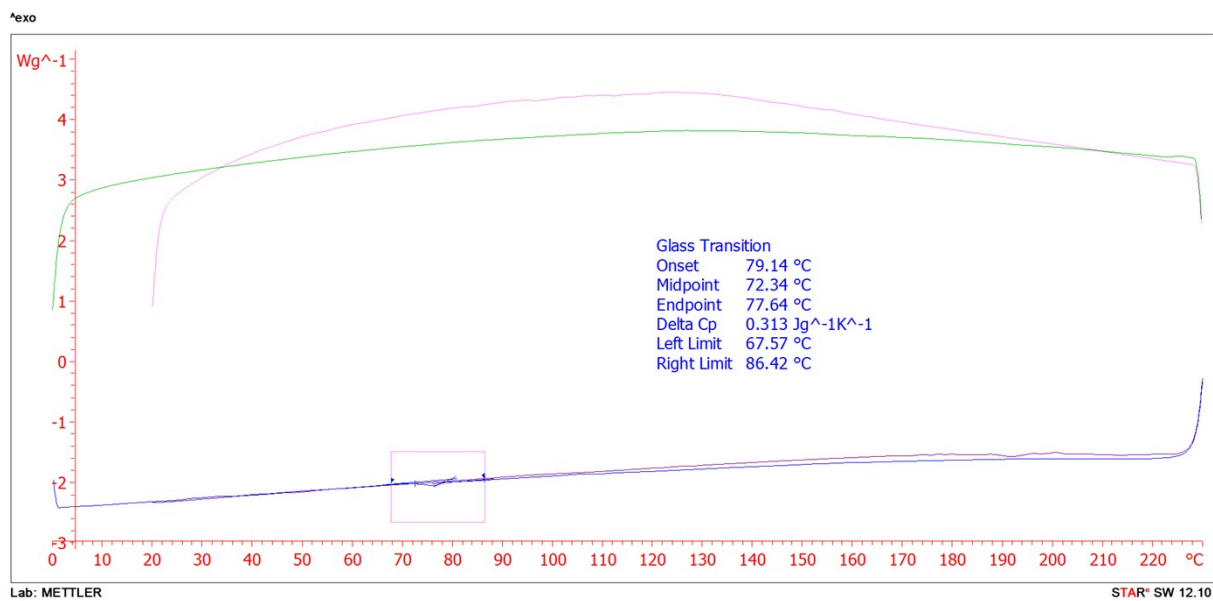

**Fig. S16.** DSC graph of TpCN.



## 7. Single Crystal analysis.

| <b>Table S6 Crystal data and structure refinement for TmCN_Rt_Cu.</b> |                                                                        |
|-----------------------------------------------------------------------|------------------------------------------------------------------------|
| Identification code                                                   | TmCN_                                                                  |
| Empirical formula                                                     | C <sub>33</sub> H <sub>15</sub> N <sub>9</sub> O <sub>3</sub>          |
| Formula weight                                                        | 585.54                                                                 |
| Temperature/K                                                         | 293(2)                                                                 |
| Crystal system                                                        | trigonal                                                               |
| Space group                                                           | R-3                                                                    |
| a/Å                                                                   | 23.8757(6)                                                             |
| b/Å                                                                   | 23.8757(6)                                                             |
| c/Å                                                                   | 17.6972(5)                                                             |
| $\alpha$ /°                                                           | 90                                                                     |
| $\beta$ /°                                                            | 90                                                                     |
| $\gamma$ /°                                                           | 120                                                                    |
| Volume/Å <sup>3</sup>                                                 | 8736.7(5)                                                              |
| Z                                                                     | 12                                                                     |
| $\rho_{\text{calc}}$ /cm <sup>3</sup>                                 | 1.335                                                                  |
| $\mu$ /mm <sup>-1</sup>                                               | 0.748                                                                  |
| F(000)                                                                | 3600.0                                                                 |
| Radiation                                                             | Cu K $\alpha$ ( $\lambda$ = 1.54184)                                   |
| 2 $\Theta$ range for data collection/°                                | 6.574 to 134.182                                                       |
| Index ranges                                                          | -28 $\leq$ h $\leq$ 28, -28 $\leq$ k $\leq$ 19, -20 $\leq$ l $\leq$ 21 |
| Reflections collected                                                 | 9227                                                                   |
| Independent reflections                                               | 3327 [ $R_{\text{int}}$ = 0.0509, $R_{\text{sigma}}$ = 0.0465]         |
| Data/restraints/parameters                                            | 3327/0/271                                                             |
| Goodness-of-fit on F <sup>2</sup>                                     | 0.984                                                                  |
| Final R indexes [ $I \geq 2\sigma(I)$ ]                               | $R_1$ = 0.0682, $wR_2$ = 0.1993                                        |
| Final R indexes [all data]                                            | $R_1$ = 0.0830, $wR_2$ = 0.2149                                        |
| CCDC No                                                               | 2285795                                                                |

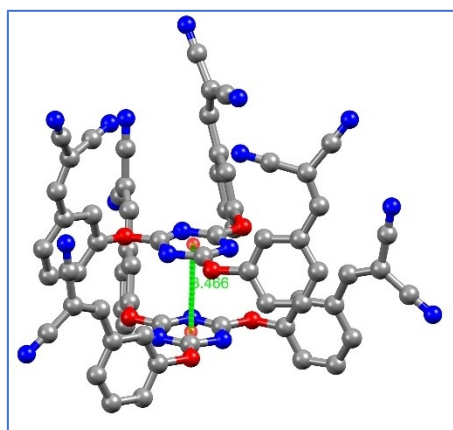

A

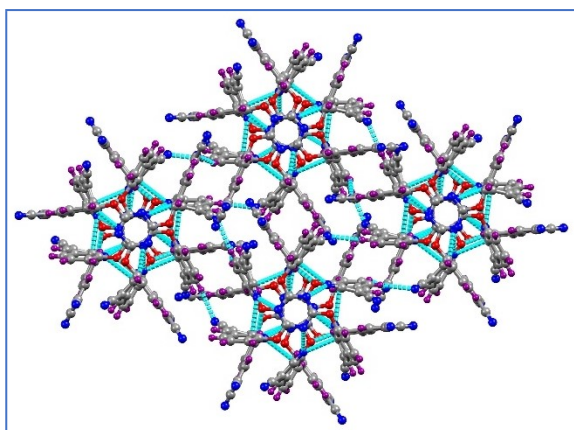

B

**Fig. S17** (A)  $\pi$ - $\pi$  interaction between the two **TmCN** molecules. (B) Three-dimensional hydrogen-bonded assembly of **TmCN** (the H-bonding interactions are represented as cyan color).

### 8. A comparison of HOMO/LUMO energy levels:

**Table S7.** A comparison between HOMO/LUMO energy levels of some reported and the present materials. (Measured using Ag/AgCl, Pt-wire, and Pt-disc electrodes, and tetrabutylammonium hexafluorophosphate as supporting electrolyte).

| S.No | Structure of ETM                                                                                                             | HOMO/LUMO (eV) | Reference                              |
|------|------------------------------------------------------------------------------------------------------------------------------|----------------|----------------------------------------|
| 1.   | <p style="text-align: center;">TPFDPS</p> 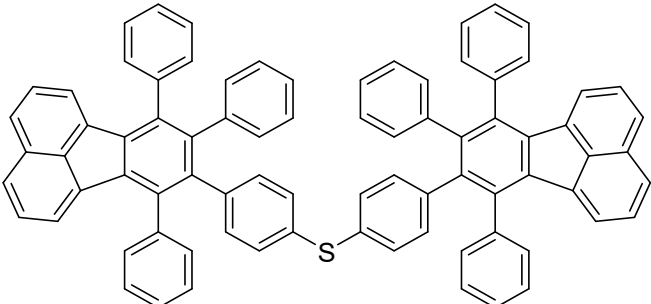  | -6.1/-2.8      | New J. Chem., 2015, 39, 6351-6357      |
| 2.   | <p style="text-align: center;">TPFDBT</p>  | -6.2/-2.8      | New J. Chem., 2015, 39, 6351-6357      |
| 3.   | <p style="text-align: center;">SPDP</p>   | -6.17/-2.57    | J. Mater. Chem. C, 2014,2,1012 9-10137 |

|    |                                                                                                                                 |             |                                         |
|----|---------------------------------------------------------------------------------------------------------------------------------|-------------|-----------------------------------------|
| 4  | 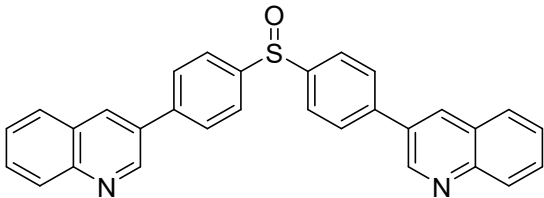 <p style="text-align: center;">SPDQ</p>       | -6.32/-2.7  | J. Mater. Chem. C, 2014,2,1012 9-10137  |
| 5. |  <p style="text-align: center;">SPPP</p>       | -6.16/-2.37 | J. Mater. Chem. C, 2014,2,1012 9-10137  |
| 6. |  <p style="text-align: center;">TPFDBSO2</p>  | -6.1/-2.9   | J. Phys. Chem. C 2015, 119, 19297–19304 |
| 7  |  <p style="text-align: center;">TPFDBTO2</p> | -6.2/-2.8   | J. Phys. Chem. C 2015, 119, 19297–19304 |

|    |                                                                                                                                           |             |                                                  |
|----|-------------------------------------------------------------------------------------------------------------------------------------------|-------------|--------------------------------------------------|
| 8  | 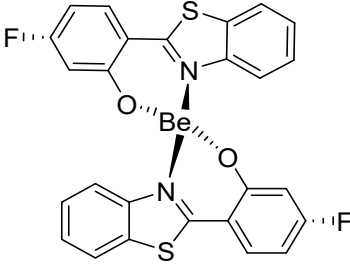 <p style="text-align: center;">Be(FBTZ)<sub>2</sub></p> | -6.14/-3.14 | RSC Adv.,<br>2016, 6,<br>5008-5015               |
| 9  |  <p style="text-align: center;">27-TPSF</p>              | -5.9/-2.7   | J. Mater.<br>Chem. C,<br>2018, 6,<br>10276-10283 |
| 10 |  <p style="text-align: center;">22-TPSF</p>             | -5.9/-2.6   | J. Mater.<br>Chem. C,<br>2018, 6,<br>10276-10283 |
| 11 |  <p style="text-align: center;">OXDPO</p>              | -6.42/-2.83 | RSC Adv.,<br>2015, 5,<br>36568-36574             |

|    |                                                                                                                               |             |                                         |
|----|-------------------------------------------------------------------------------------------------------------------------------|-------------|-----------------------------------------|
| 12 | 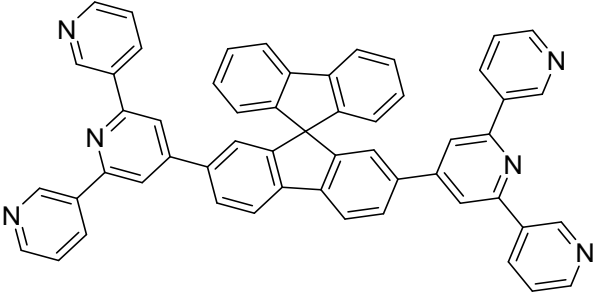 <p style="text-align: center;">27-mTPSF</p> | -6.0/-2.5   | J. Mater. Chem. C, 2019, 7, 11581-11587 |
| 13 |  <p style="text-align: center;">TpCN</p>     | -6.15/-2.82 | This work                               |
| 14 |  <p style="text-align: center;">TmCN</p>   | -6.15/-2.71 | This work                               |
| 15 |  <p style="text-align: center;">TCpCN</p>  | -6.05/-2.55 | This work                               |

|     |                                                                                                                            |             |           |
|-----|----------------------------------------------------------------------------------------------------------------------------|-------------|-----------|
| 16. |  <p style="text-align: center;">TCmCN</p> | -6.15/-2.76 | This work |
|-----|----------------------------------------------------------------------------------------------------------------------------|-------------|-----------|

9. Computed electron reorganization energy comparison with some reported ETMs:<sup>9</sup>

| Table S8 Electron reorganization energies |                                  |
|-------------------------------------------|----------------------------------|
| Compound                                  | Electron reorganization energies |
| Phen                                      | 0.109                            |
| 4-PPhen                                   | 0.172                            |
| 2-PPhen                                   | 0.106                            |
| 2,9-DPPhen                                | 0.084                            |
| 2,4-DPPhen                                | 0.107                            |
| 4,7-DPPhen(Bphen)                         | 0.120                            |
| p-bPPhenB                                 | 0.056                            |
| m-bPPhenB                                 | 0.069                            |
| TmPyPB                                    | 0.071                            |
| <b>TCpCN</b>                              | 0.20                             |
| <b>TCmCN</b>                              | 0.25                             |
| <b>TpCN</b>                               | 0.20                             |
| <b>TmCN</b>                               | 0.22                             |



## 10. $^1\text{H}$ and $^{13}\text{C}$ NMR

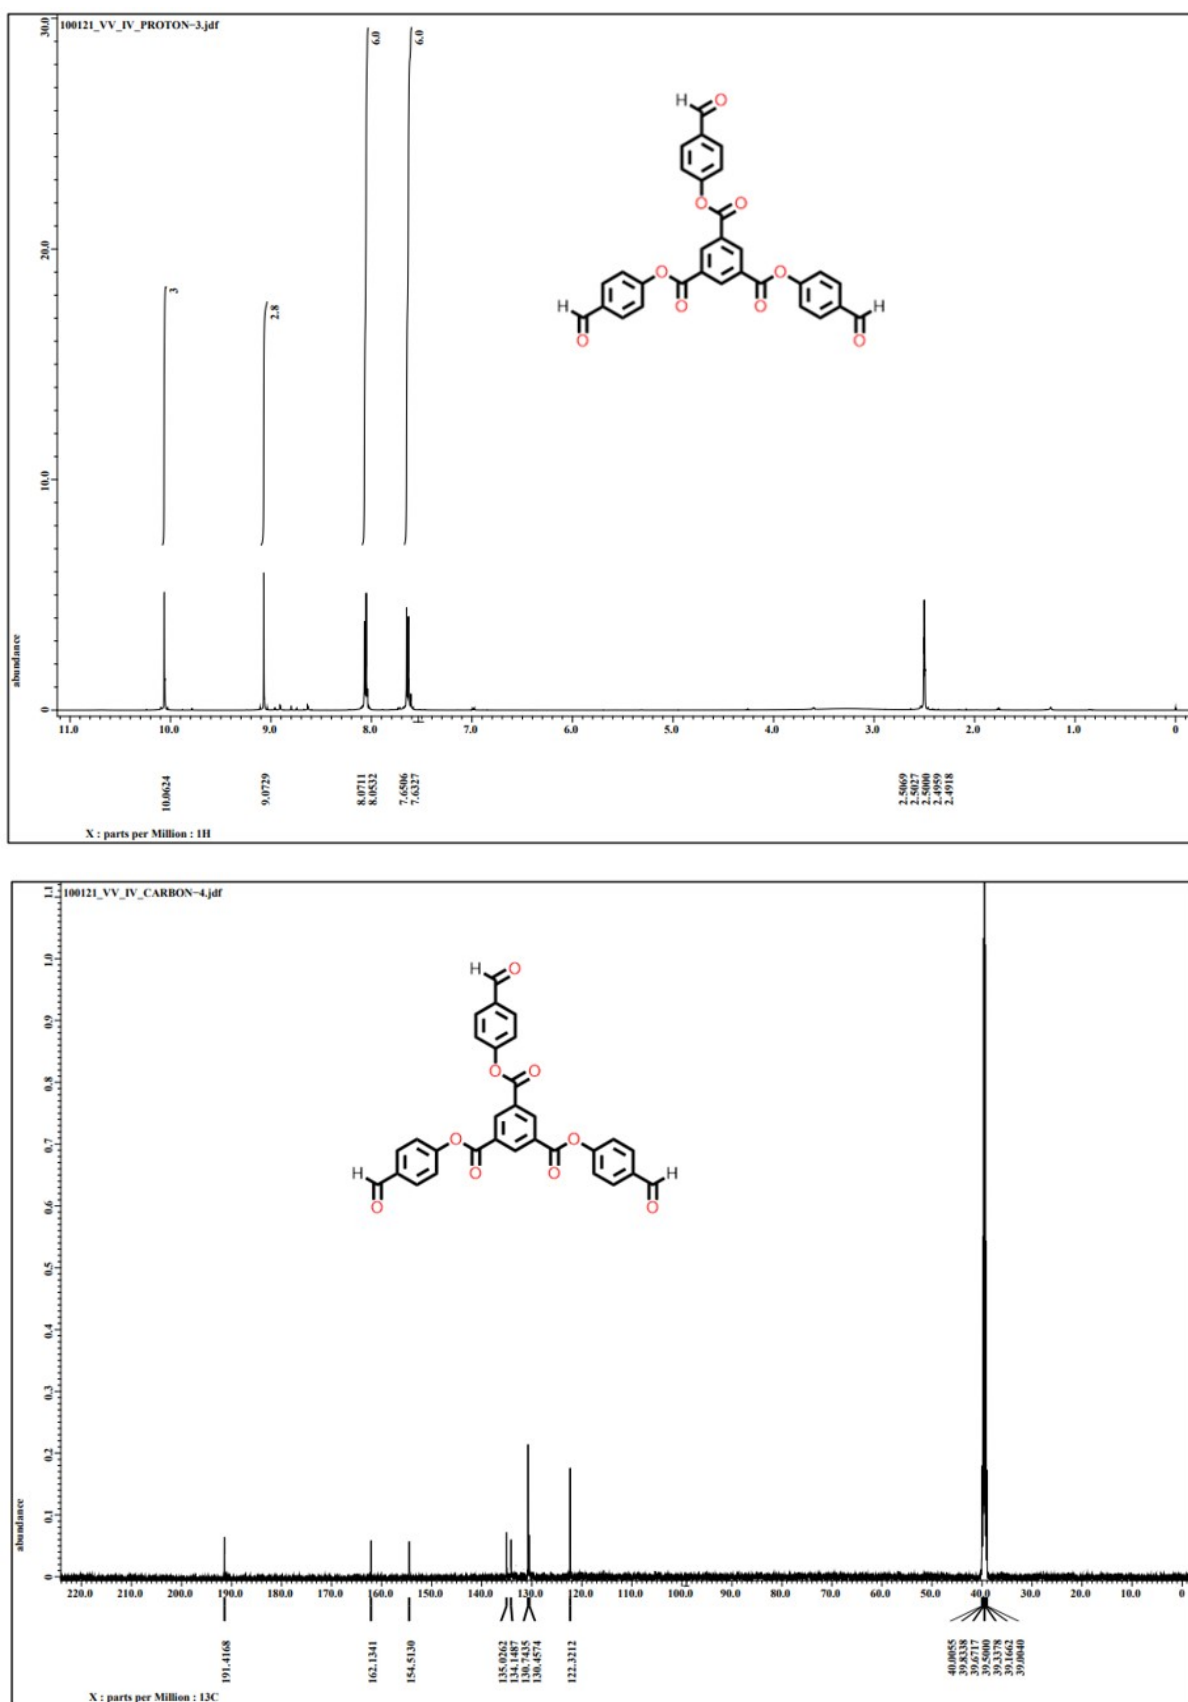

Fig. S18.  $^1\text{H}$  and  $^{13}\text{C}$  NMR of TCpCHO.

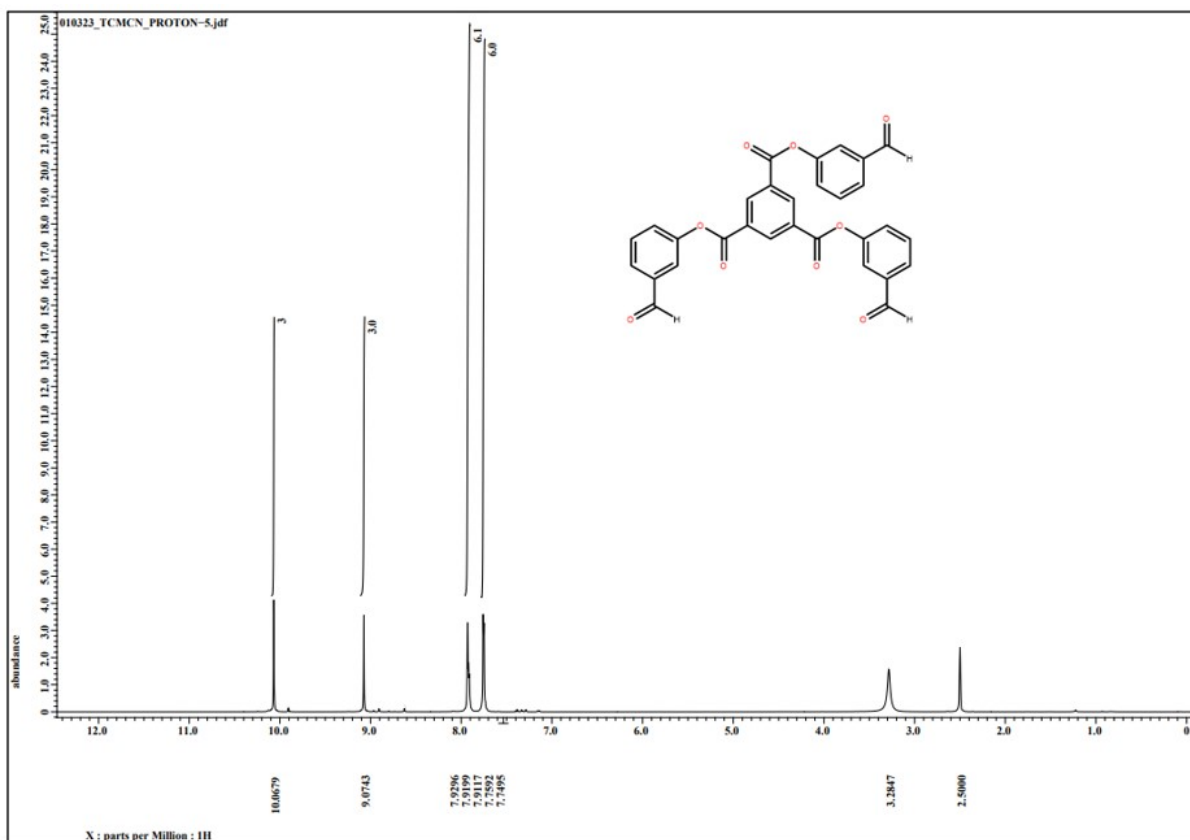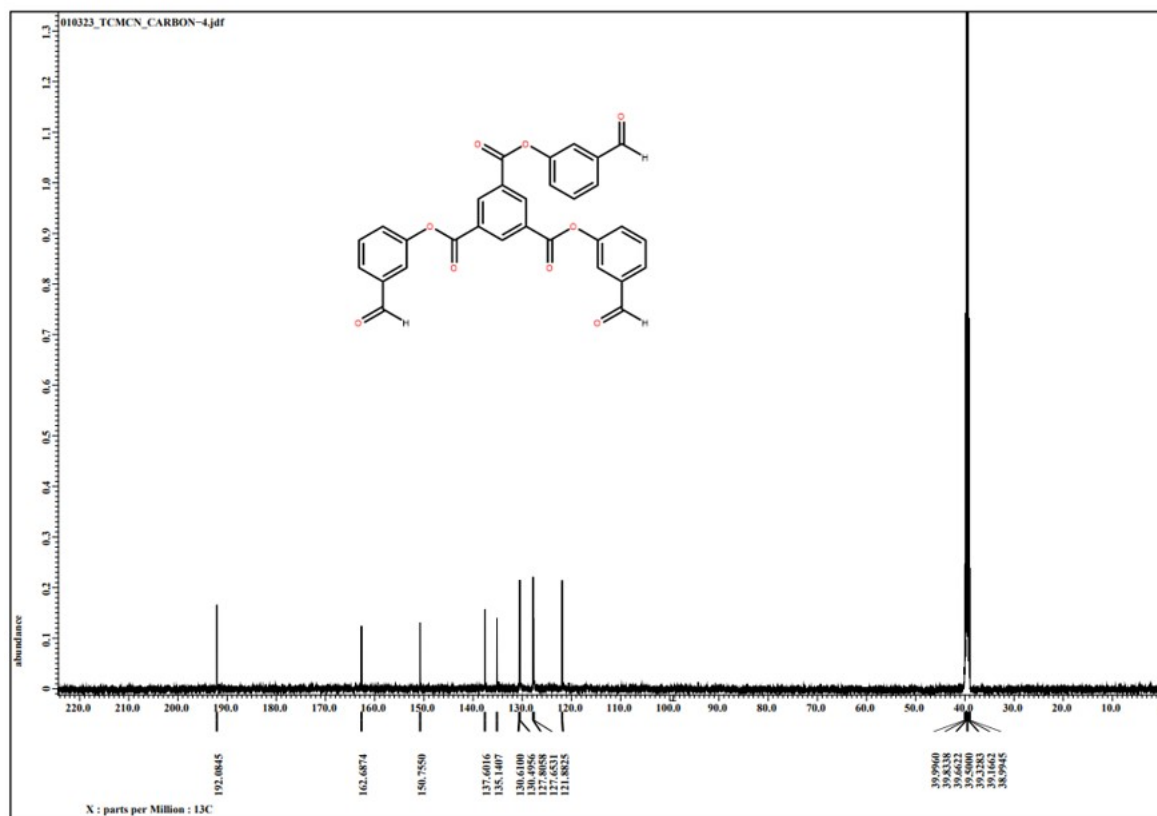

Fig. S19.  $^1\text{H}$  and  $^{13}\text{C}$  NMR of TCMCHO

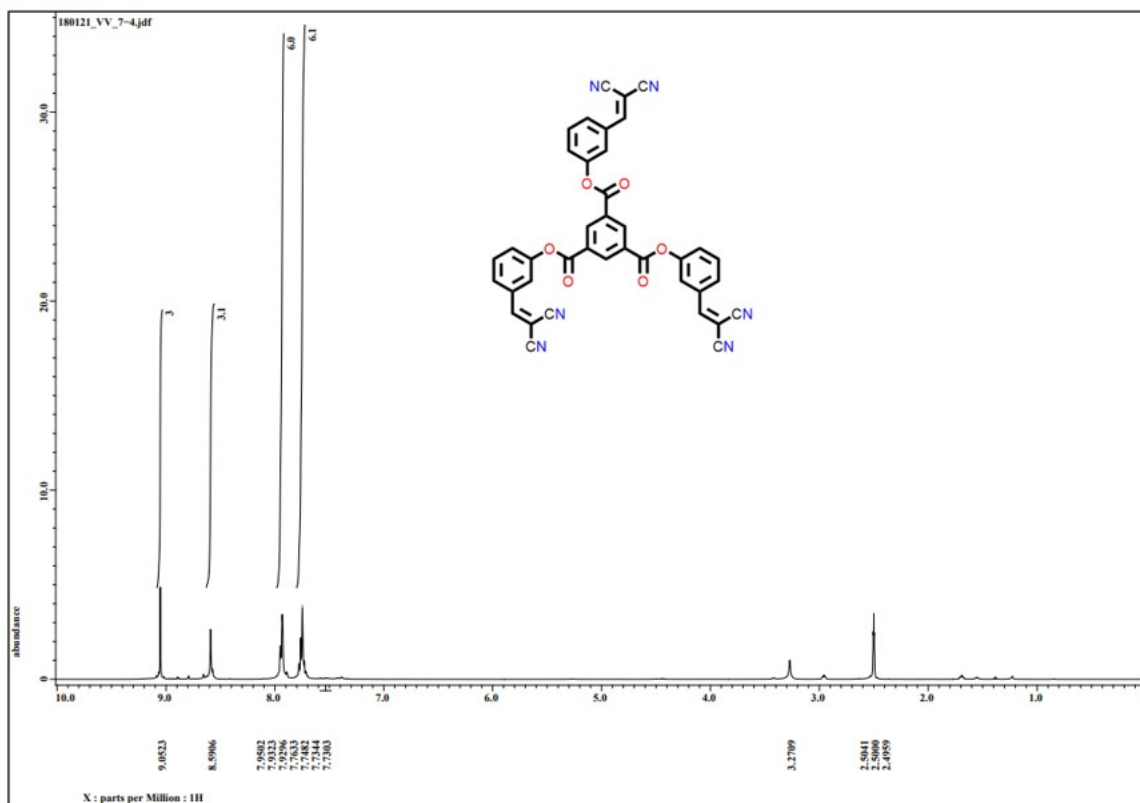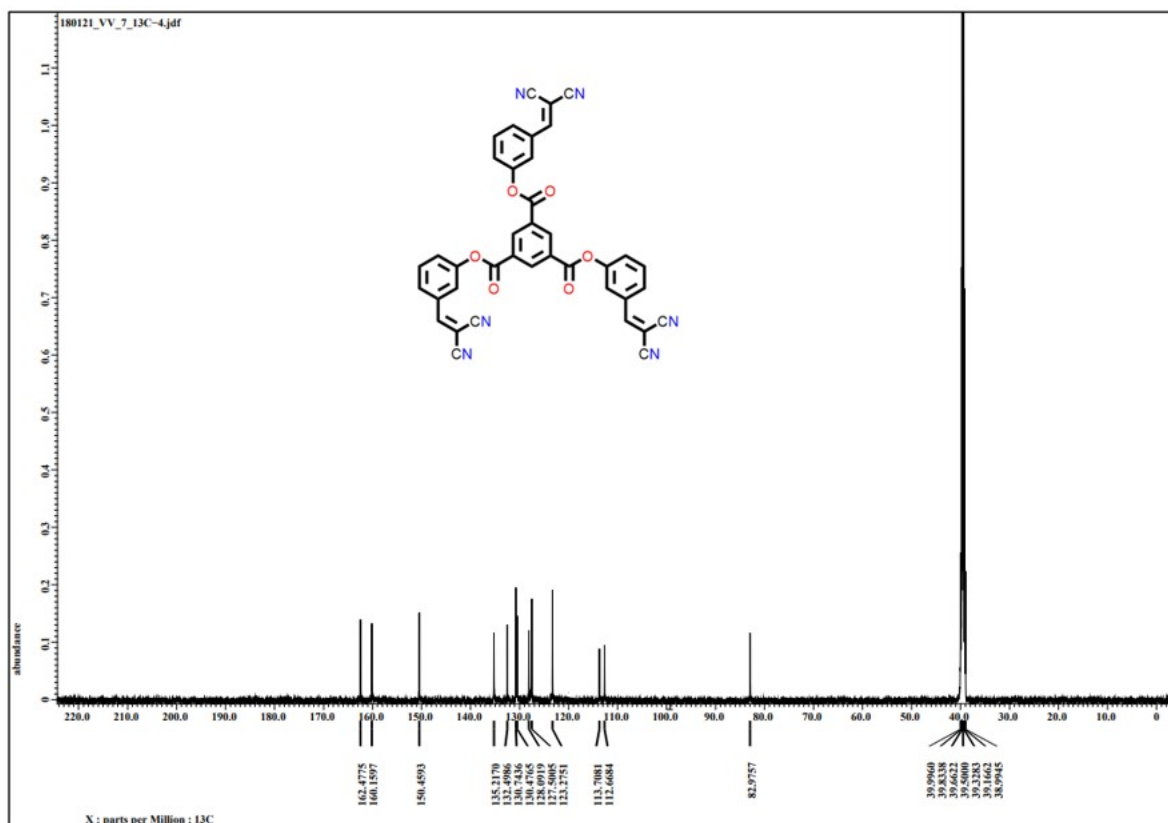

Fig. S20.  $^1\text{H}$  and  $^{13}\text{C}$  NMR of TCmCN.

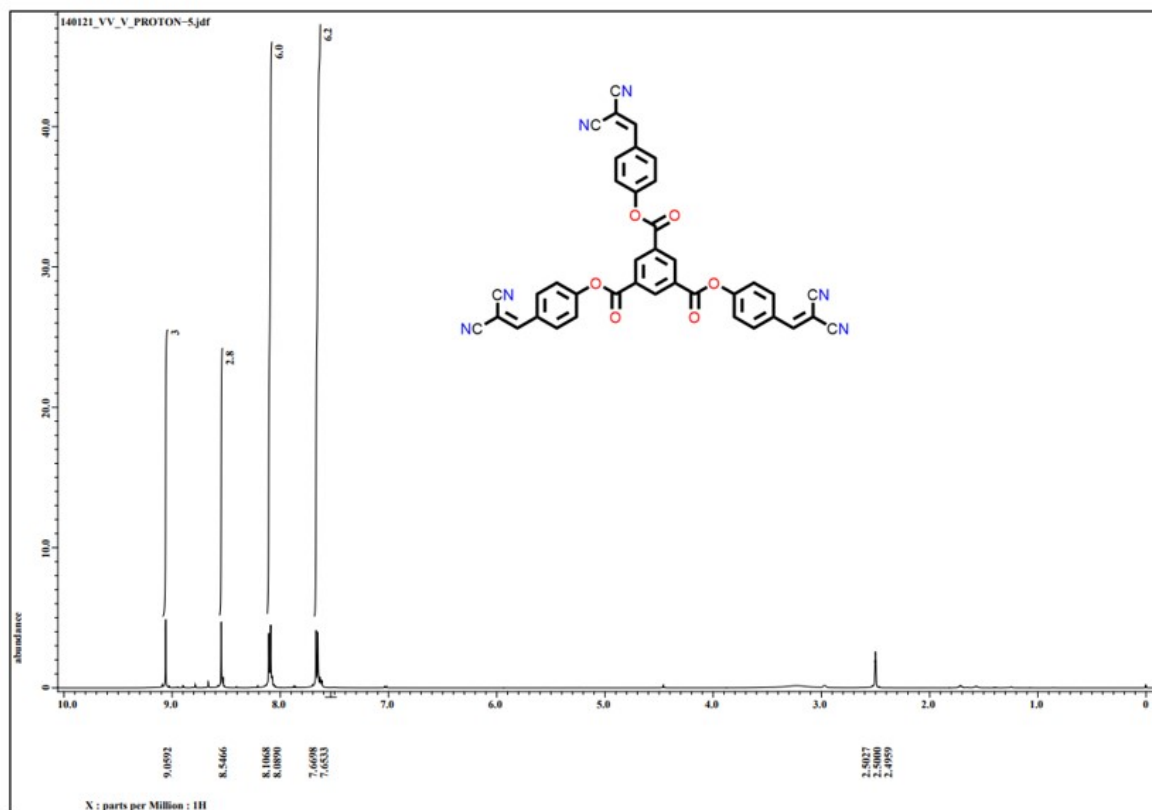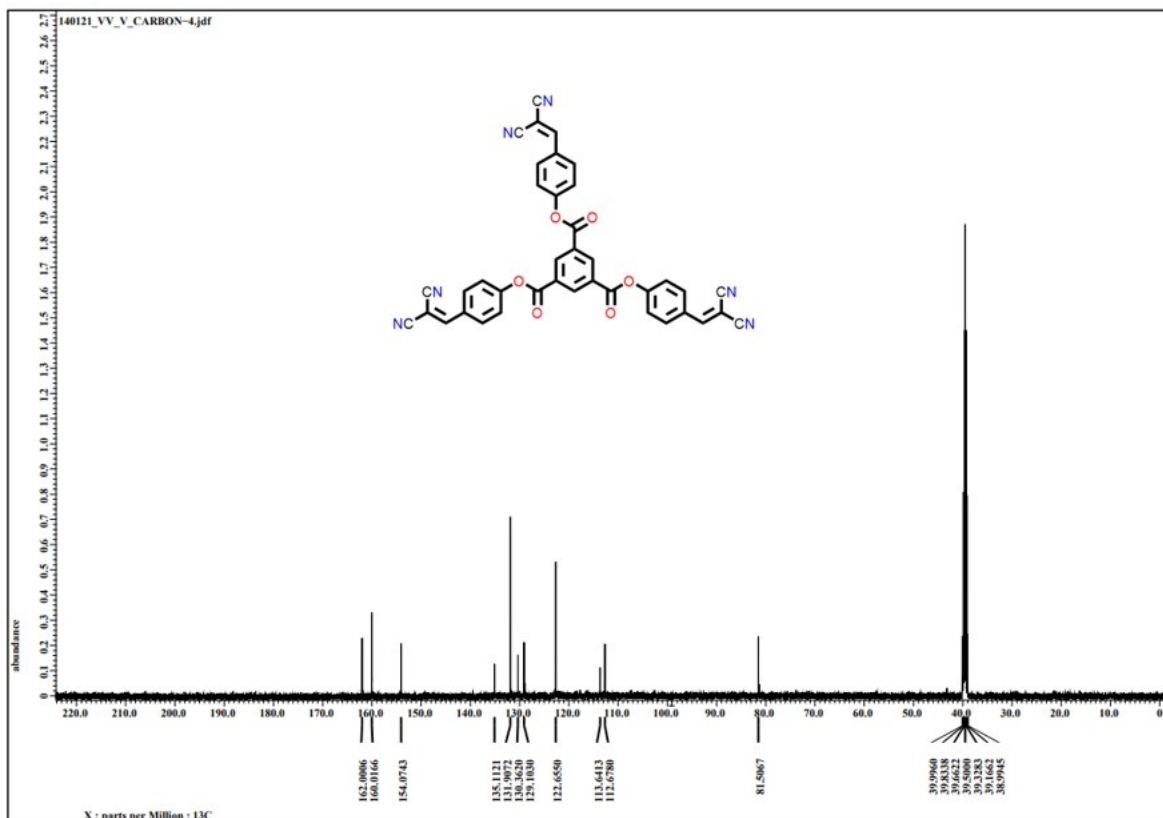

Fig. S21.  $^1\text{H}$  and  $^{13}\text{C}$  NMR of TCpCN.

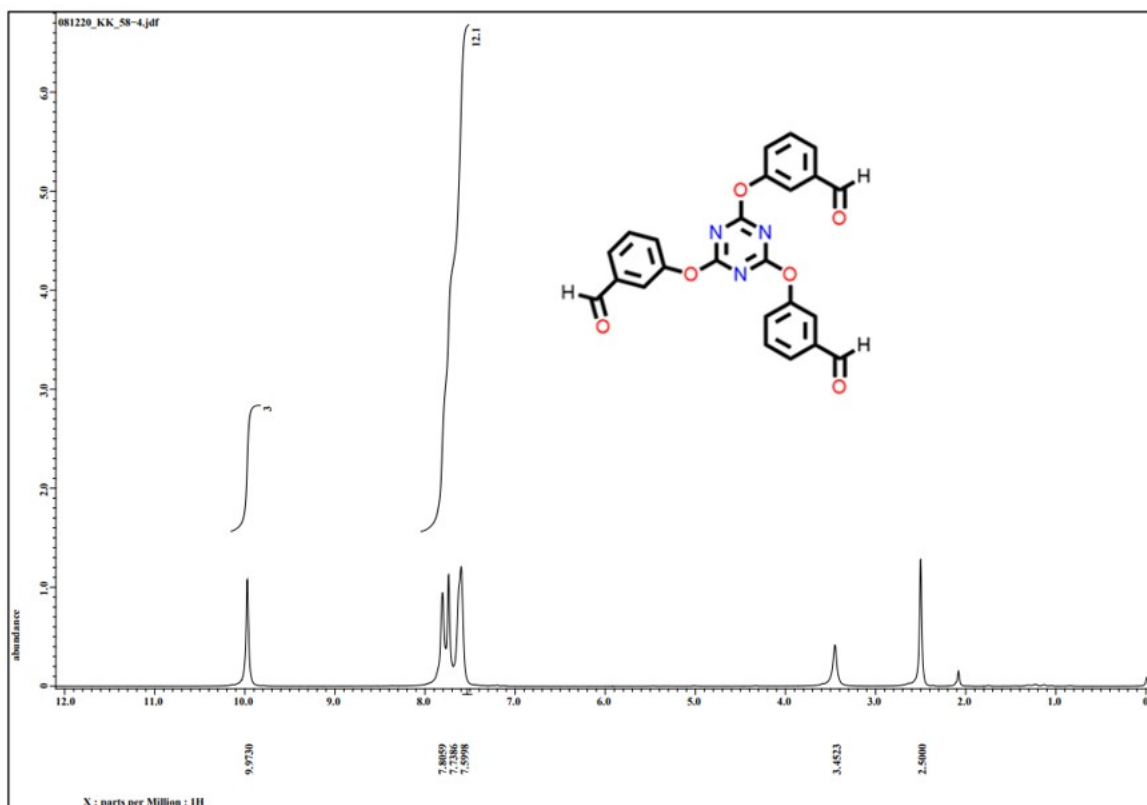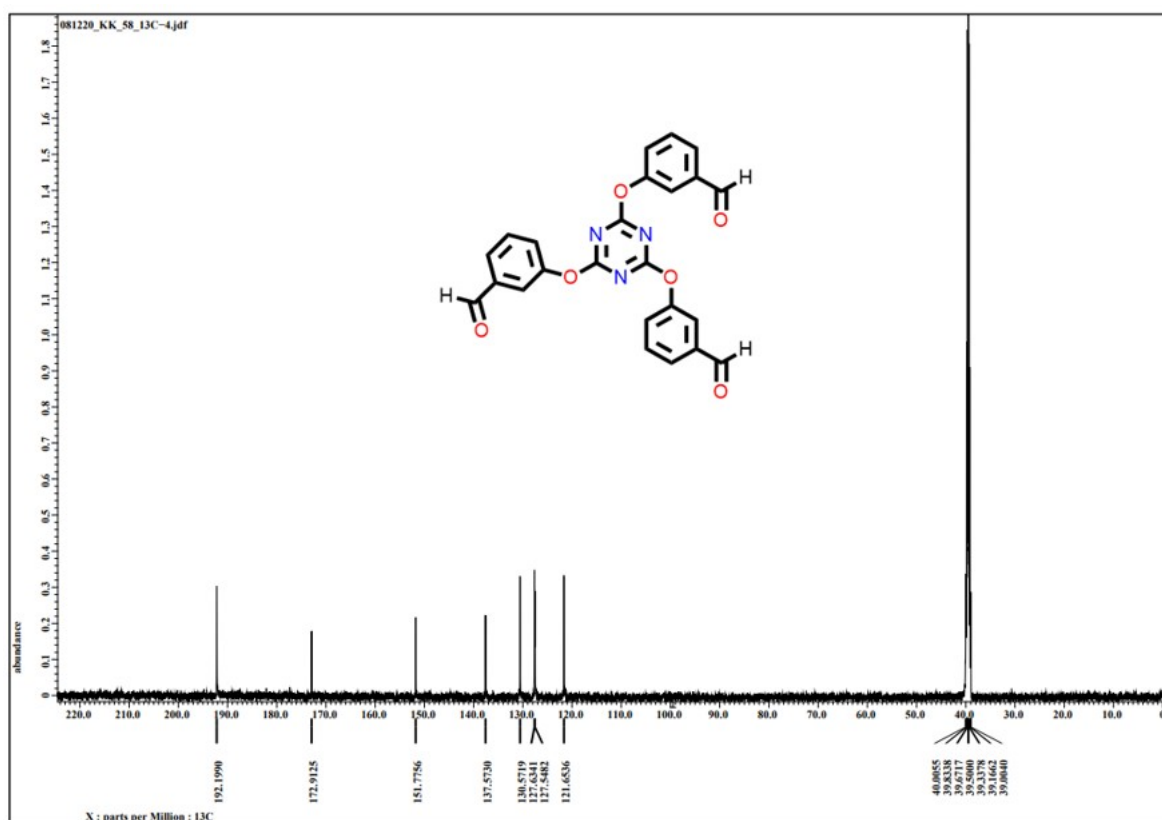

Fig. S22.  $^1\text{H}$  and  $^{13}\text{C}$  NMR of TmCHO

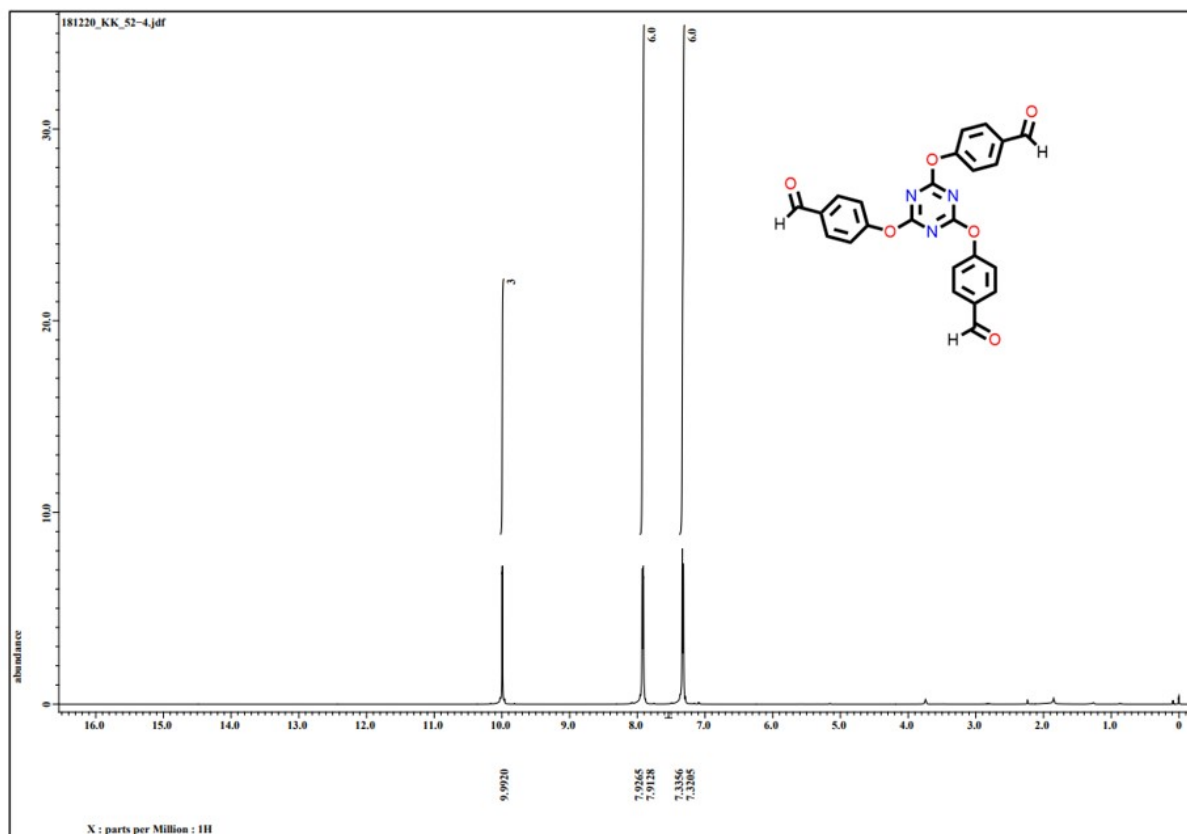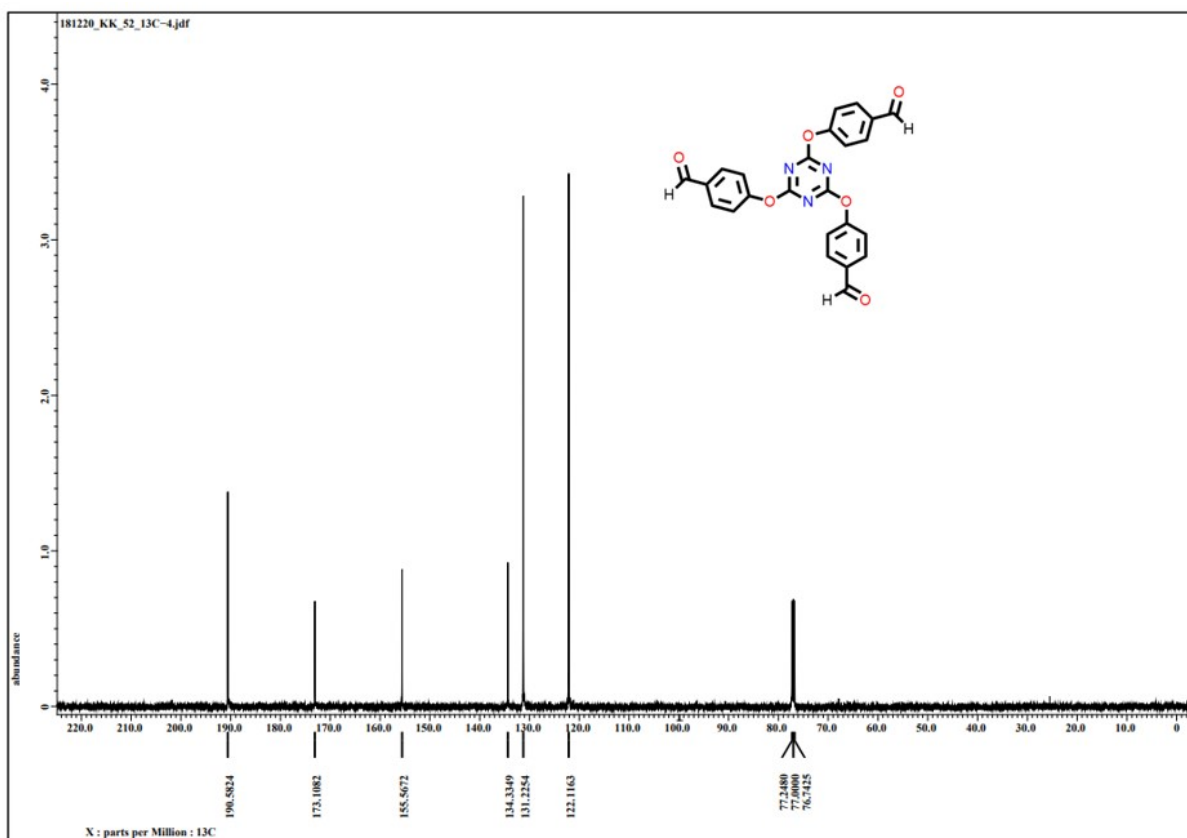

Fig. S23.  $^1\text{H}$  and  $^{13}\text{C}$  NMR of TpCHO.

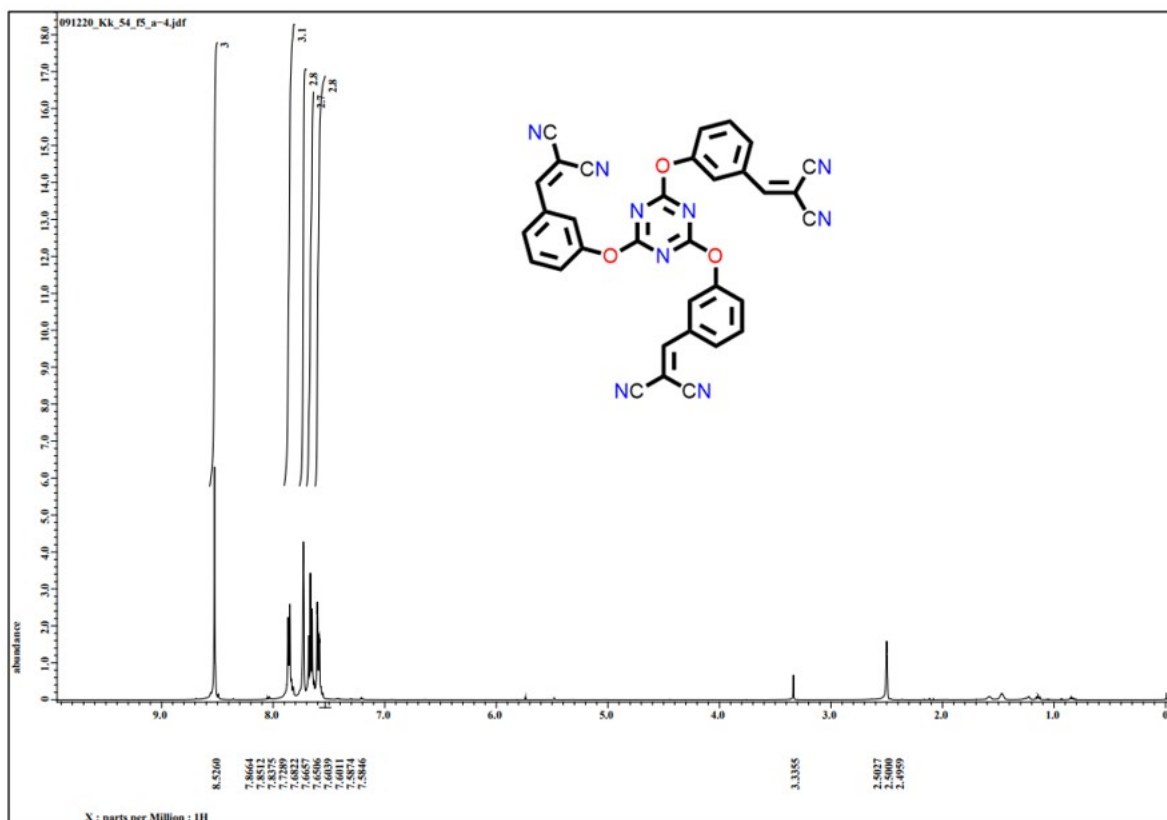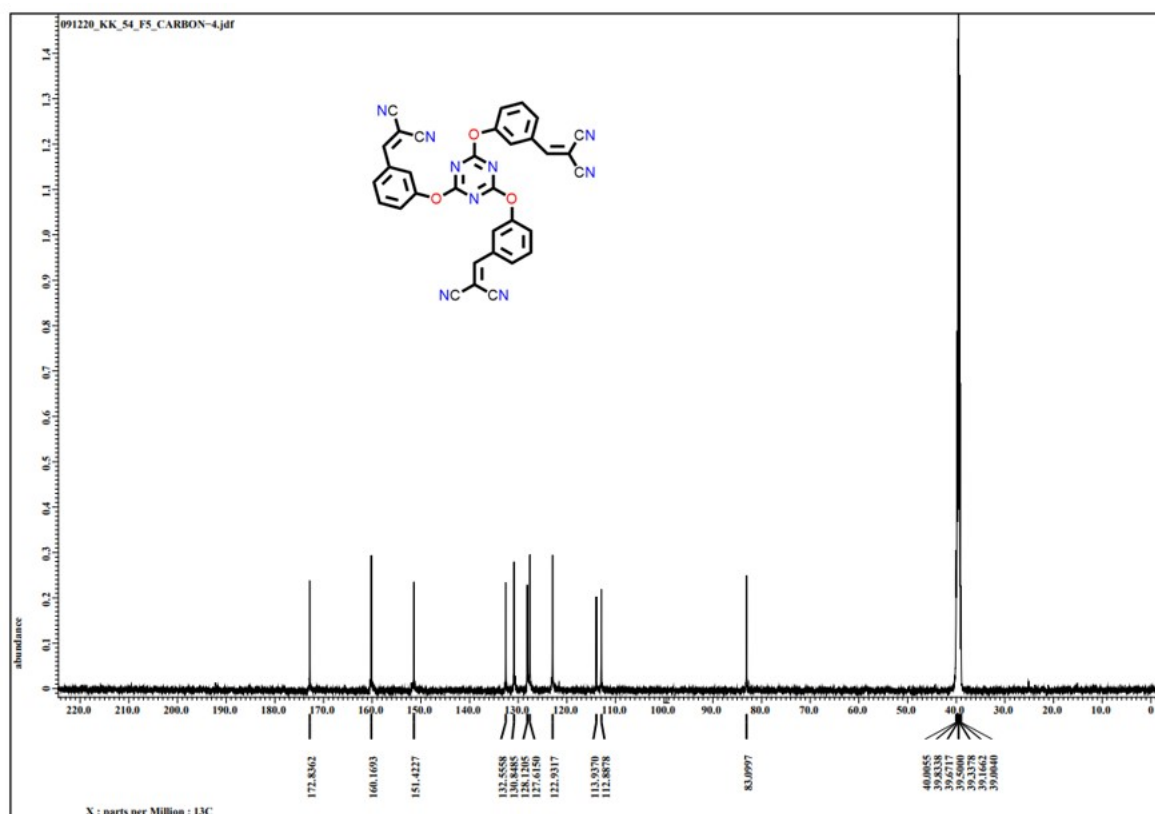

Fig. S24. <sup>1</sup>H and <sup>13</sup>C NMR of TmCN.

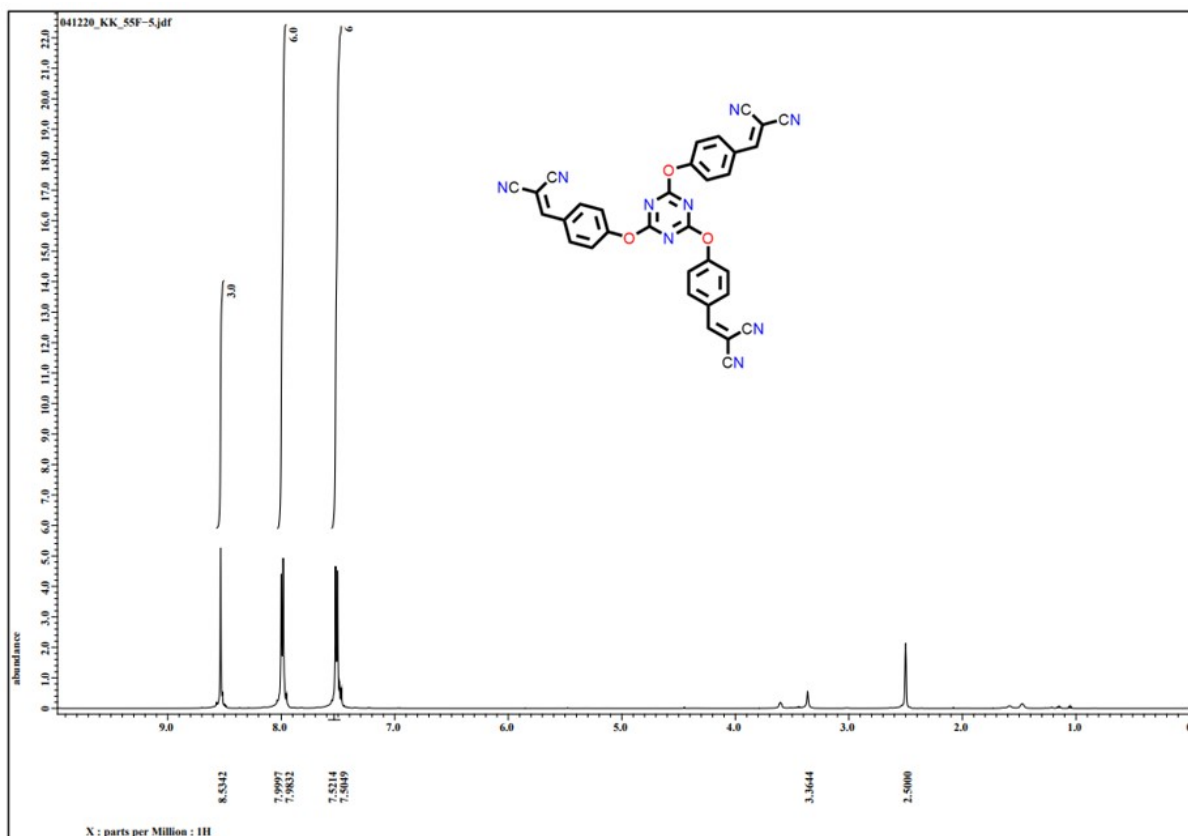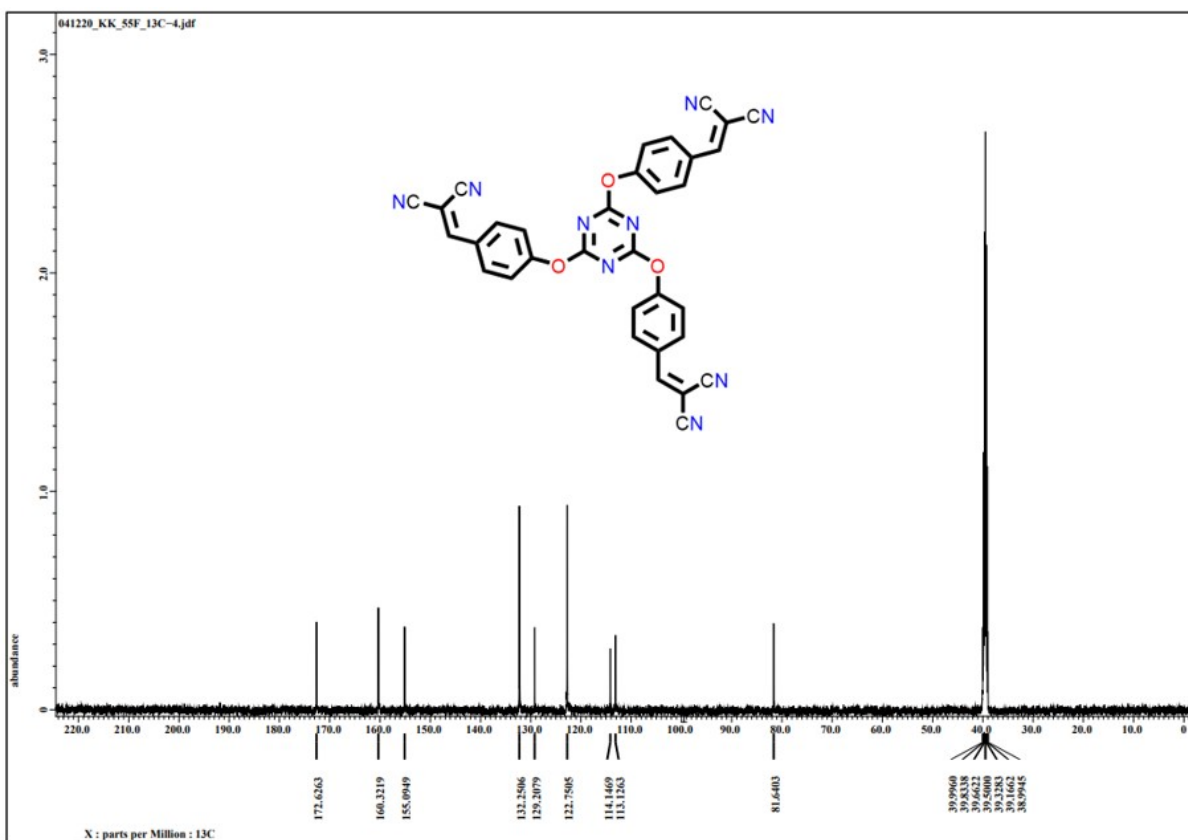

Fig. S25.  $^1\text{H}$  and  $^{13}\text{C}$  NMR of TpCN.



## 11. HRMS

### Elemental Composition Report

Page 1

#### Single Mass Analysis

Tolerance = 20.0 PPM / DBE: min = -1.5, max = 50.0

Element prediction: Off

Number of isotope peaks used for i-FIT = 3

Monoisotopic Mass, Even Electron Ions

48 formula(e) evaluated with 1 results within limits (up to 50 closest results for each mass)

Elements Used:

C: 0-35 H: 0-50 N: 0-9 O: 0-3

060423\_SRY\_TMCN 73 (0.757)

Test Name :

1: TOF MS ES+

IITRPR

XEVO G2-XS QTOF

060423\_SRY\_TMCN

2.65e+006

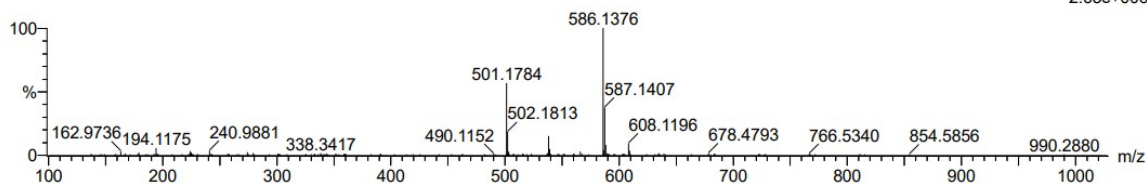

Minimum: -1.5  
Maximum: 5.0 20.0 50.0

| Mass     | Calc. Mass | mDa | PPM | DBE  | i-FIT | Norm | Conf (%) | Formula       |
|----------|------------|-----|-----|------|-------|------|----------|---------------|
| 586.1376 | 586.1376   | 0.0 | 0.0 | 30.5 | 643.3 | n/a  | n/a      | C33 H16 N9 O3 |

Fig. S26. HRMS of TmCN

### Elemental Composition Report

Page 1

#### Single Mass Analysis

Tolerance = 20.0 PPM / DBE: min = -1.5, max = 50.0

Element prediction: Off

Number of isotope peaks used for i-FIT = 3

Monoisotopic Mass, Even Electron Ions

62 formula(e) evaluated with 1 results within limits (up to 50 closest results for each mass)

Elements Used:

C: 0-33 H: 0-100 N: 0-9 O: 0-3

130423\_SRY\_TPCN 19 (0.214)

Test Name :

1: TOF MS ES+

IITRPR

XEVO G2-XS QTOF

130423\_SRY\_TPCN

2.35e+006

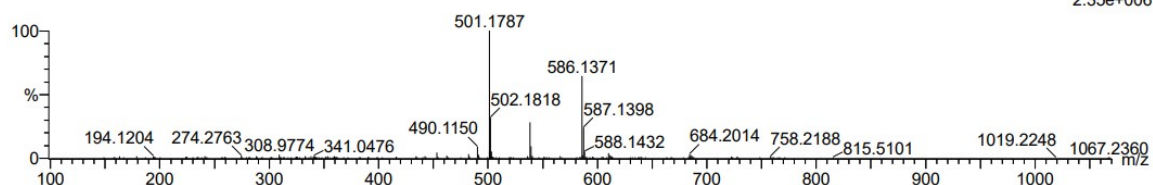

Minimum: -1.5  
Maximum: 5.0 20.0 50.0

| Mass     | Calc. Mass | mDa  | PPM  | DBE  | i-FIT | Norm | Conf (%) | Formula       |
|----------|------------|------|------|------|-------|------|----------|---------------|
| 586.1371 | 586.1376   | -0.5 | -0.9 | 30.5 | 557.0 | n/a  | n/a      | C33 H16 N9 O3 |

Fig. S27. HRMS of TpCN.

# Display Report

## Analysis Info

Analysis Name D:\Data\User Data\Kishan\M-CN-MEOH--.d  
Method Tune\_pos\_Mid.m  
Sample Name  
Comment

Acquisition Date 5/2/2023 11:27:32 AM

Operator HRMS  
Instrument maXis impact 1819696.00160

## Acquisition Parameter

|             |          |                      |          |                  |           |
|-------------|----------|----------------------|----------|------------------|-----------|
| Source Type | ESI      | Ion Polarity         | Positive | Set Nebulizer    | 0.3 Bar   |
| Focus       | Active   | Set Capillary        | 3500 V   | Set Dry Heater   | 200 °C    |
| Scan Begin  | 50 m/z   | Set End Plate Offset | -500 V   | Set Dry Gas      | 4.0 l/min |
| Scan End    | 3000 m/z | Set Charging Voltage | 2000 V   | Set Divert Valve | Source    |
|             |          | Set Corona           | 0 nA     | Set APCI Heater  | 0 °C      |

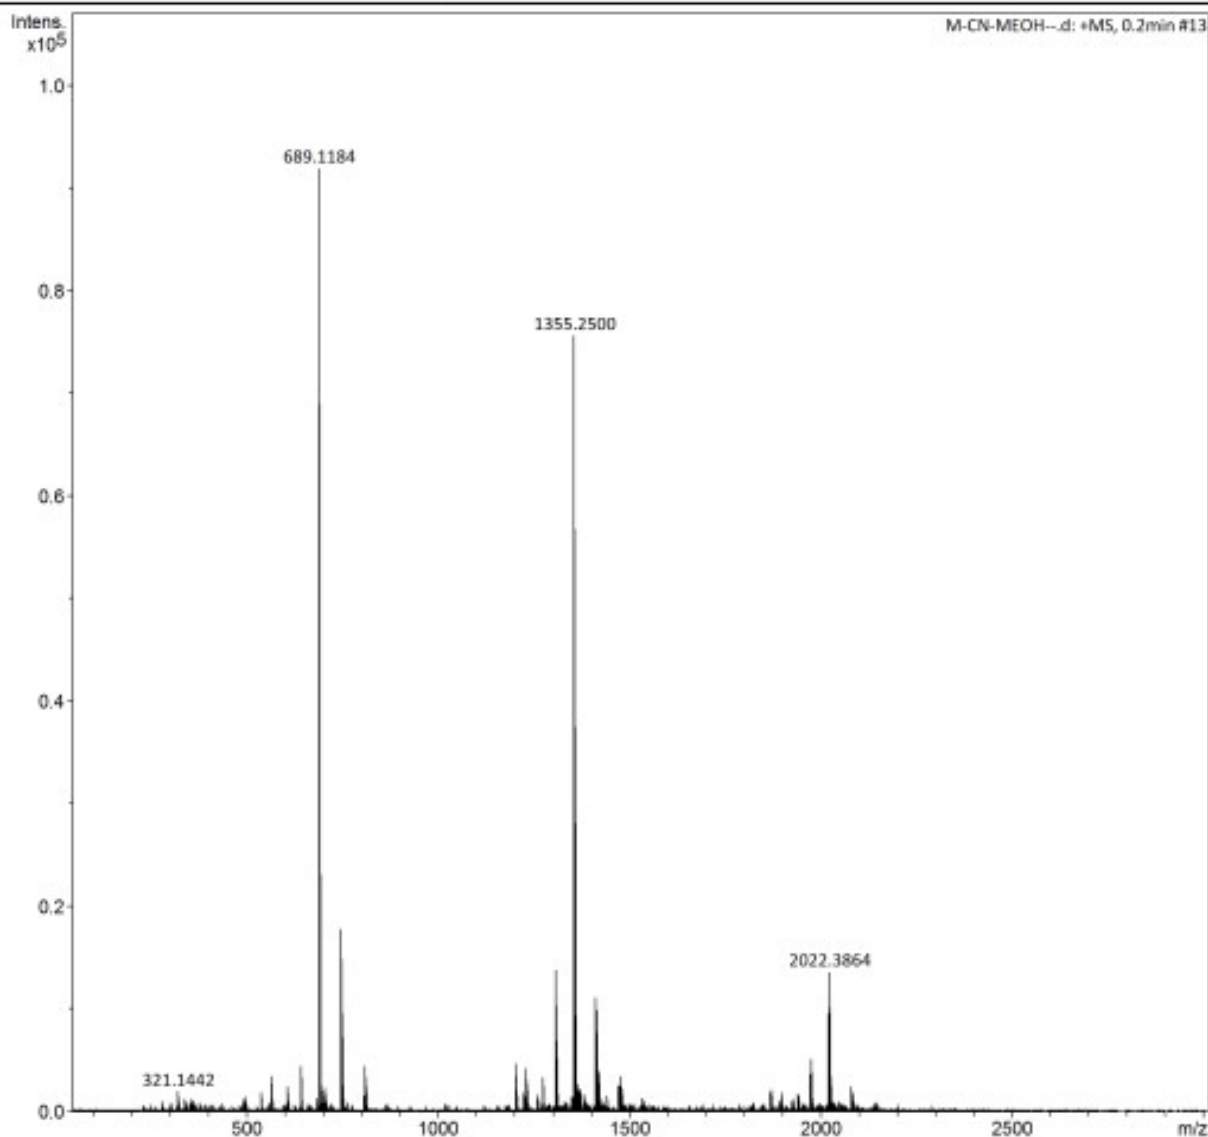

M-CN-MEOH--.d

Bruker Compass DataAnalysis 4.1

printed: 5/2/2023 11:30:15 AM

by: HRMS

Page 1 of 1

Fig. S28. HRMS of TCmCN.

**Analysis Info**

Analysis Name D:\Data\User Data\Kishan\TCPCN-.d  
Method Tune\_pos\_Mid.m  
Sample Name  
Comment

Acquisition Date 5/9/2023 11:20:29 AM

Operator HRMS  
Instrument maXis impact 1819696.00160

**Acquisition Parameter**

|             |          |                      |          |                  |           |
|-------------|----------|----------------------|----------|------------------|-----------|
| Source Type | ESI      | Ion Polarity         | Positive | Set Nebulizer    | 0.3 Bar   |
| Focus       | Active   | Set Capillary        | 3500 V   | Set Dry Heater   | 200 °C    |
| Scan Begin  | 50 m/z   | Set End Plate Offset | -500 V   | Set Dry Gas      | 4.0 l/min |
| Scan End    | 3000 m/z | Set Charging Voltage | 2000 V   | Set Divert Valve | Source    |
|             |          | Set Corona           | 0 nA     | Set APCI Heater  | 0 °C      |

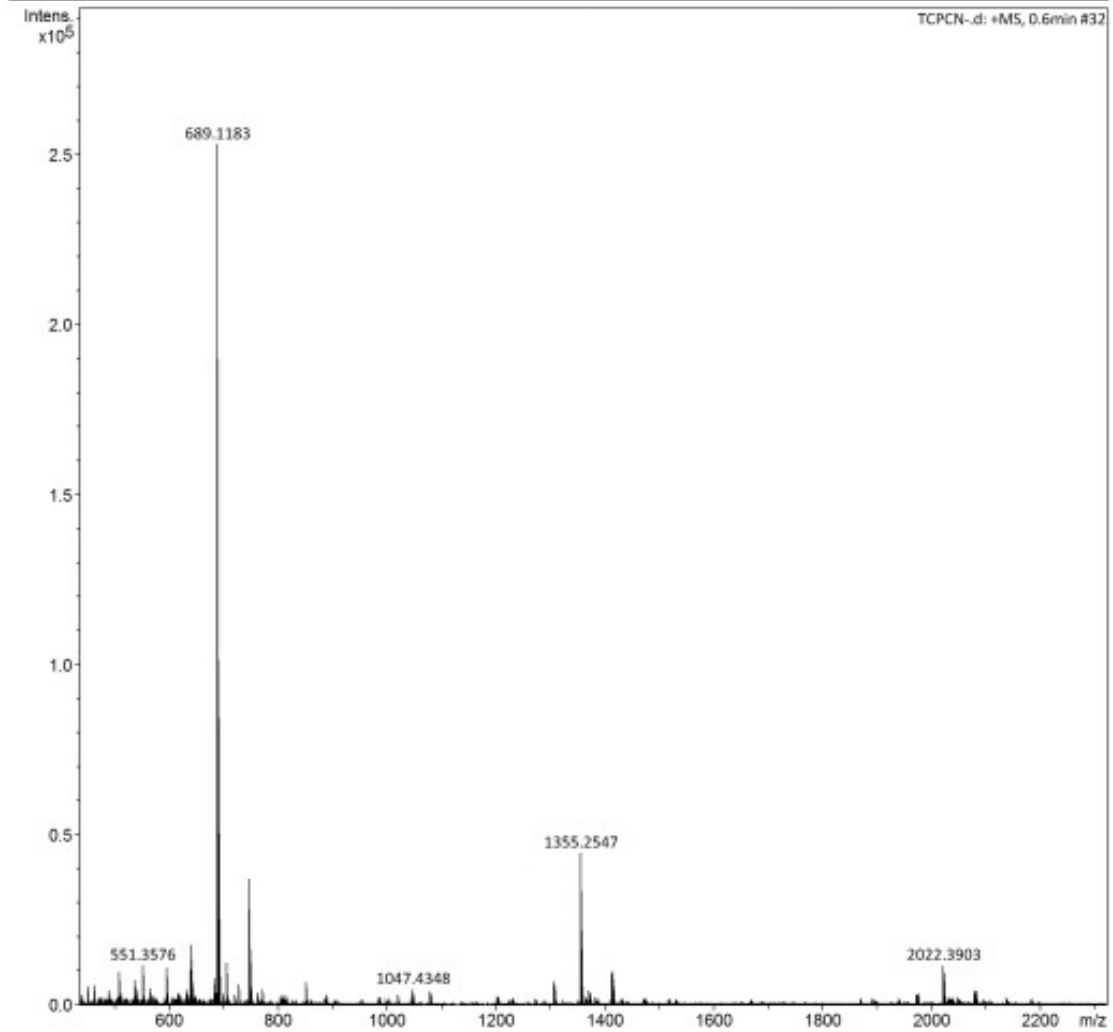

TCPCN-.d

Bruker Compass DataAnalysis 4.1

printed: 5/9/2023 11:22:33 AM

by: HRMS

Page 1 of 1

**Fig. S29.** HRMS of TCpCN.

## 12. Cartesian Co-ordinates:

Cartesian coordinates of the optimized structures of the TCpCN molecule.

| atomic number | X-coordinate | Y-coordinate | Z-coordinate |
|---------------|--------------|--------------|--------------|
| 6             | 0.958035000  | -2.068398000 | 0.302998000  |
| 6             | -0.363980000 | -1.623897000 | 0.312653000  |
| 6             | -0.640225000 | -0.254445000 | 0.295326000  |
| 6             | 0.410596000  | 0.664756000  | 0.268864000  |
| 6             | 1.733750000  | 0.217817000  | 0.258216000  |
| 6             | 2.008483000  | -1.150024000 | 0.275423000  |
| 6             | 3.397135000  | -1.689273000 | 0.268325000  |
| 6             | 0.183517000  | 2.136879000  | 0.253807000  |
| 6             | -1.438707000 | -2.655289000 | 0.339719000  |
| 6             | 5.680526000  | -0.942884000 | 0.233403000  |
| 6             | -1.610207000 | 3.739763000  | 0.269776000  |
| 6             | -3.833843000 | -2.844074000 | 0.349393000  |
| 6             | -4.041439000 | -3.859592000 | -0.585266000 |
| 6             | -5.251700000 | -4.532849000 | -0.595219000 |
| 6             | -6.272746000 | -4.204432000 | 0.320954000  |
| 6             | -6.029215000 | -3.168144000 | 1.246282000  |

|   |              |              |              |
|---|--------------|--------------|--------------|
| 6 | -4.821198000 | -2.490690000 | 1.263919000  |
| 6 | 6.455067000  | -0.249012000 | -0.695715000 |
| 6 | 7.830917000  | -0.400003000 | -0.693466000 |
| 6 | 8.456297000  | -1.250530000 | 0.241917000  |
| 6 | 7.642266000  | -1.930812000 | 1.171877000  |
| 6 | 6.264261000  | -1.784290000 | 1.177440000  |
| 6 | -1.130147000 | 4.684852000  | 1.173510000  |
| 6 | -1.704755000 | 5.946051000  | 1.180439000  |
| 6 | -2.756760000 | 6.286837000  | 0.304649000  |
| 6 | -3.220890000 | 5.302554000  | -0.592701000 |
| 6 | -2.650925000 | 4.041495000  | -0.608313000 |
| 6 | 9.881056000  | -1.486012000 | 0.334514000  |
| 6 | 10.928327000 | -1.008585000 | -0.400345000 |
| 6 | 12.257346000 | -1.424079000 | -0.074550000 |
| 6 | 10.831256000 | -0.106007000 | -1.501123000 |
| 6 | -3.276232000 | 7.633474000  | 0.408646000  |
| 6 | -4.279477000 | 8.271263000  | -0.263158000 |
| 6 | -4.579508000 | 9.632478000  | 0.056099000  |
| 6 | -5.091627000 | 7.698921000  | -1.287134000 |
| 6 | -7.568389000 | -4.845340000 | 0.391290000  |

|   |               |              |              |
|---|---------------|--------------|--------------|
| 6 | -8.122823000  | -5.852226000 | -0.345716000 |
| 6 | -7.493407000  | -6.537666000 | -1.427302000 |
| 6 | -9.450411000  | -6.289910000 | -0.043799000 |
| 8 | 3.680658000   | -2.857102000 | 0.298747000  |
| 8 | -1.252722000  | -3.842832000 | 0.348438000  |
| 8 | 1.053612000   | 2.966612000  | 0.243380000  |
| 8 | -1.152975000  | 2.430133000  | 0.240587000  |
| 8 | 4.318246000   | -0.679454000 | 0.209287000  |
| 8 | -2.678107000  | -2.075654000 | 0.366827000  |
| 7 | -7.011327000  | -7.110742000 | -2.307544000 |
| 7 | -10.522817000 | -6.647447000 | 0.195707000  |
| 7 | -5.765962000  | 7.262926000  | -2.118324000 |
| 7 | -4.826415000  | 10.732347000 | 0.310210000  |
| 7 | 13.333369000  | -1.756426000 | 0.184294000  |
| 7 | 10.784671000  | 0.624263000  | -2.395679000 |
| 1 | 1.169661000   | -3.129258000 | 0.316567000  |
| 1 | -1.662636000  | 0.091995000  | 0.302904000  |
| 1 | 2.535752000   | 0.941957000  | 0.237499000  |
| 1 | -3.268553000  | -4.119179000 | -1.294082000 |
| 1 | -5.395043000  | -5.314834000 | -1.326235000 |

|   |              |              |              |
|---|--------------|--------------|--------------|
| 1 | -6.800039000 | -2.896488000 | 1.957662000  |
| 1 | -4.633035000 | -1.694367000 | 1.972265000  |
| 1 | 5.967642000  | 0.402313000  | -1.409664000 |
| 1 | 8.410698000  | 0.145247000  | -1.423448000 |
| 1 | 8.104150000  | -2.583922000 | 1.902899000  |
| 1 | 5.657682000  | -2.313227000 | 1.897727000  |
| 1 | -0.327091000 | 4.443383000  | 1.854049000  |
| 1 | -1.337714000 | 6.686581000  | 1.881238000  |
| 1 | -4.024242000 | 5.513729000  | -1.282830000 |
| 1 | -3.001614000 | 3.280676000  | -1.293687000 |
| 1 | 10.169074000 | -2.165462000 | 1.130088000  |
| 1 | -2.780366000 | 8.245955000  | 1.154758000  |
| 1 | -8.215992000 | -4.455219000 | 1.169748000  |

**Cartesian coordinates of the optimized structures of the TCmCN molecule.**

| <b>atomic number</b> | <b>X-coordinate</b> | <b>Y-coordinate</b> | <b>Z-coordinate</b> |
|----------------------|---------------------|---------------------|---------------------|
| 6                    | -1.338322000        | -2.054546000        | -1.310021000        |
| 6                    | 0.022638000         | -1.847067000        | -1.086004000        |
| 6                    | 0.478706000         | -0.592500000        | -0.673733000        |
| 6                    | -0.431639000        | 0.449921000         | -0.488364000        |
| 6                    | -1.794173000        | 0.239478000         | -0.711222000        |

|   |              |              |              |
|---|--------------|--------------|--------------|
| 6 | -2.248677000 | -1.013753000 | -1.122943000 |
| 6 | -3.689225000 | -1.299101000 | -1.375411000 |
| 6 | -0.007381000 | 1.809289000  | -0.049726000 |
| 6 | 0.942109000  | -2.999723000 | -1.300702000 |
| 6 | -5.846018000 | -0.289186000 | -1.318245000 |
| 6 | 1.918402000  | 3.083703000  | 0.534696000  |
| 6 | 3.243706000  | -3.616618000 | -1.183539000 |
| 6 | 4.009861000  | -3.893009000 | -0.066662000 |
| 6 | 5.088568000  | -4.793050000 | -0.171575000 |
| 6 | 5.348353000  | -5.392156000 | -1.420156000 |
| 6 | 4.565262000  | -5.097267000 | -2.528704000 |
| 6 | 3.505106000  | -4.202196000 | -2.421335000 |
| 6 | -6.644693000 | -0.081610000 | -0.209556000 |
| 6 | -8.045898000 | -0.082870000 | -0.355767000 |
| 6 | -8.590462000 | -0.301947000 | -1.636735000 |
| 6 | -7.766853000 | -0.506888000 | -2.736180000 |
| 6 | -6.383302000 | -0.499637000 | -2.586915000 |
| 6 | 2.810467000  | 3.700552000  | -0.323719000 |
| 6 | 3.478859000  | 4.875398000  | 0.075704000  |
| 6 | 3.214302000  | 5.399984000  | 1.356107000  |



|   |              |              |              |
|---|--------------|--------------|--------------|
| 6 | 2.315209000  | 4.762386000  | 2.199626000  |
| 6 | 1.659766000  | 3.597919000  | 1.800655000  |
| 6 | -8.989947000 | 0.123701000  | 0.725325000  |
| 6 | -8.802299000 | 0.359045000  | 2.055591000  |
| 6 | -9.941706000 | 0.523490000  | 2.904749000  |
| 6 | -7.540226000 | 0.462148000  | 2.714319000  |
| 6 | 4.397265000  | 5.448050000  | -0.890026000 |
| 6 | 5.180899000  | 6.563060000  | -0.838859000 |
| 6 | 6.002504000  | 6.890695000  | -1.963253000 |
| 6 | 5.271426000  | 7.472807000  | 0.257236000  |
| 6 | 5.967761000  | -5.161097000 | 0.921259000  |
| 6 | 6.006720000  | -4.758694000 | 2.223839000  |
| 6 | 5.123605000  | -3.816505000 | 2.831886000  |
| 6 | 7.005014000  | -5.299689000 | 3.093987000  |
| 8 | -4.126243000 | -2.358255000 | -1.742678000 |
| 8 | 0.598319000  | -4.096309000 | -1.656896000 |
| 8 | -0.752186000 | 2.735782000  | 0.135907000  |
| 8 | 1.346896000  | 1.881404000  | 0.112235000  |
| 8 | -4.464454000 | -0.202172000 | -1.131137000 |
| 8 | 2.237947000  | -2.659125000 | -1.036138000 |

|   |               |              |              |
|---|---------------|--------------|--------------|
| 7 | 4.424822000   | -3.056663000 | 3.351071000  |
| 7 | 7.809287000   | -5.732716000 | 3.801351000  |
| 7 | 5.369035000   | 8.229073000  | 1.125364000  |
| 7 | 6.667976000   | 7.160043000  | -2.868448000 |
| 7 | -10.858034000 | 0.656925000  | 3.595613000  |
| 7 | -6.534194000  | 0.550952000  | 3.275739000  |
| 1 | -1.689571000  | -3.026794000 | -1.629003000 |
| 1 | 1.531330000   | -0.429708000 | -0.497423000 |
| 1 | -2.486646000  | 1.055442000  | -0.560129000 |
| 1 | 3.756373000   | -3.404344000 | 0.862254000  |
| 1 | 6.173303000   | -6.088168000 | -1.513445000 |
| 1 | 4.780112000   | -5.562152000 | -3.482634000 |
| 1 | 2.891934000   | -3.960674000 | -3.279066000 |
| 1 | -6.165732000  | 0.080234000  | 0.744530000  |
| 1 | -9.666495000  | -0.306713000 | -1.762452000 |
| 1 | -8.200481000  | -0.669810000 | -3.714773000 |
| 1 | -5.730389000  | -0.650134000 | -3.436422000 |
| 1 | 2.990835000   | 3.268019000  | -1.300032000 |
| 1 | 3.706882000   | 6.297348000  | 1.699457000  |
| 1 | 2.121429000   | 5.171115000  | 3.183390000  |

|   |               |              |              |
|---|---------------|--------------|--------------|
| 1 | 0.964992000   | 3.097411000  | 2.462096000  |
| 1 | -10.030419000 | 0.082645000  | 0.420513000  |
| 1 | 4.473467000   | 4.891779000  | -1.818551000 |
| 1 | 6.730513000   | -5.884503000 | 0.652766000  |

**Cartesian coordinates of the optimized structures of the TmCN molecule.**

**atomic number X-coordinate Y-coordinate Z-coordinate**

|   |              |              |              |
|---|--------------|--------------|--------------|
| 7 | 1.553603000  | -2.829618000 | -0.726267000 |
| 6 | 0.335309000  | -2.323022000 | -0.592225000 |
| 7 | 0.020973000  | -1.045866000 | -0.390075000 |
| 6 | 1.078554000  | -0.246284000 | -0.327484000 |
| 7 | 2.352470000  | -0.607746000 | -0.445498000 |
| 6 | 2.511224000  | -1.910555000 | -0.640713000 |
| 8 | 3.749534000  | -2.408850000 | -0.795863000 |
| 8 | 0.901443000  | 1.066874000  | -0.116970000 |
| 8 | -0.647068000 | -3.233165000 | -0.695799000 |
| 6 | 4.880030000  | -1.614081000 | -0.630295000 |
| 6 | -0.382328000 | 1.611424000  | -0.070904000 |
| 6 | -1.976067000 | -2.896054000 | -0.452770000 |
| 6 | -2.395372000 | -2.498498000 | 0.815720000  |
| 6 | -3.740921000 | -2.267181000 | 1.042816000  |

|   |              |              |              |
|---|--------------|--------------|--------------|
| 6 | -4.686746000 | -2.435194000 | 0.008913000  |
| 6 | -4.226288000 | -2.853457000 | -1.256171000 |
| 6 | -2.878971000 | -3.082912000 | -1.491403000 |
| 6 | 5.177217000  | -1.023633000 | 0.597218000  |
| 6 | 6.362774000  | -0.324601000 | 0.743133000  |
| 6 | 7.269866000  | -0.208305000 | -0.331805000 |
| 6 | 6.940881000  | -0.830615000 | -1.553336000 |
| 6 | 5.753887000  | -1.530598000 | -1.706839000 |
| 6 | -0.839723000 | 2.092647000  | 1.148205000  |
| 6 | -2.072266000 | 2.727293000  | 1.194649000  |
| 6 | -2.857082000 | 2.886484000  | 0.034470000  |
| 6 | -2.354265000 | 2.391659000  | -1.187598000 |
| 6 | -1.123603000 | 1.759716000  | -1.240904000 |
| 6 | 8.531295000  | 0.500354000  | -0.285697000 |
| 6 | 9.135275000  | 1.211637000  | 0.710818000  |
| 6 | 10.407654000 | 1.816535000  | 0.464983000  |
| 6 | 8.609540000  | 1.424632000  | 2.020149000  |
| 6 | -4.126300000 | 3.564927000  | 0.200082000  |
| 6 | -5.122420000 | 3.849661000  | -0.688270000 |
| 6 | -6.285354000 | 4.548733000  | -0.235819000 |

|   |              |              |              |
|---|--------------|--------------|--------------|
| 6 | -5.127211000 | 3.505779000  | -2.073279000 |
| 6 | -6.112644000 | -2.220922000 | 0.141436000  |
| 6 | -6.868998000 | -1.787693000 | 1.191968000  |
| 6 | -6.374736000 | -1.418266000 | 2.478658000  |
| 6 | -8.285703000 | -1.672864000 | 1.033163000  |
| 7 | -6.004268000 | -1.109510000 | 3.528909000  |
| 7 | -9.430806000 | -1.578800000 | 0.910967000  |
| 7 | -5.161395000 | 3.238883000  | -3.197152000 |
| 7 | -7.226961000 | 5.114031000  | 0.123007000  |
| 7 | 11.435678000 | 2.307489000  | 0.271852000  |
| 7 | 8.210316000  | 1.614879000  | 3.087872000  |
| 1 | -1.675309000 | -2.377248000 | 1.613743000  |
| 1 | -4.049308000 | -1.963362000 | 2.032164000  |
| 1 | -4.936754000 | -2.995821000 | -2.061722000 |
| 1 | -2.523358000 | -3.406954000 | -2.460743000 |
| 1 | 4.488916000  | -1.114319000 | 1.426425000  |
| 1 | 6.578473000  | 0.124850000  | 1.701165000  |
| 1 | 7.626163000  | -0.758497000 | -2.389593000 |
| 1 | 5.500204000  | -2.012045000 | -2.642213000 |
| 1 | -0.233482000 | 1.974365000  | 2.036771000  |

|   |              |              |              |
|---|--------------|--------------|--------------|
| 1 | -2.438230000 | 3.106354000  | 2.141337000  |
| 1 | -2.915188000 | 2.502622000  | -2.103686000 |
| 1 | -0.734707000 | 1.388464000  | -2.180075000 |
| 1 | 9.096976000  | 0.460963000  | -1.210823000 |
| 1 | -4.320487000 | 3.905235000  | 1.212029000  |
| 1 | -6.681530000 | -2.440157000 | -0.756240000 |

**Cartesian coordinates of the optimized structures of the TpCN molecule.**

| <b>atomic number</b> | <b>X-coordinate</b> | <b>Y-coordinate</b> | <b>Z-coordinate</b> |
|----------------------|---------------------|---------------------|---------------------|
| 7                    | 1.693806000         | -1.210764000        | 2.289292000         |
| 6                    | 0.456031000         | -1.054424000        | 1.839102000         |
| 7                    | 0.045220000         | -0.181208000        | 0.921297000         |
| 6                    | 1.022354000         | 0.581528000         | 0.445808000         |
| 7                    | 2.304117000         | 0.538537000         | 0.797444000         |
| 6                    | 2.563250000         | -0.380042000        | 1.720594000         |
| 8                    | 3.823067000         | -0.528545000        | 2.160731000         |
| 8                    | 0.744709000         | 1.507914000         | -0.484220000        |
| 8                    | -0.436868000        | -1.888358000        | 2.395142000         |
| 6                    | 4.836269000         | 0.295303000         | 1.654832000         |
| 6                    | -0.565166000        | 1.655453000         | -0.957100000        |
| 6                    | -1.784749000        | -1.823368000        | 2.022904000         |

|   |              |              |              |
|---|--------------|--------------|--------------|
| 6 | -2.264974000 | -2.762183000 | 1.129047000  |
| 6 | -3.637174000 | -2.790181000 | 0.807505000  |
| 6 | -4.492207000 | -1.849911000 | 1.415458000  |
| 6 | -3.985184000 | -0.921340000 | 2.314111000  |
| 6 | -2.626824000 | -0.899765000 | 2.628859000  |
| 6 | 5.600111000  | -0.168237000 | 0.601508000  |
| 6 | 6.683135000  | 0.607602000  | 0.143143000  |
| 6 | 6.954556000  | 1.834030000  | 0.782503000  |
| 6 | 6.173312000  | 2.275163000  | 1.842552000  |
| 6 | 5.103432000  | 1.504888000  | 2.288954000  |
| 6 | -1.339363000 | 2.677157000  | -0.439945000 |
| 6 | -2.625999000 | 2.918251000  | -0.962650000 |
| 6 | -3.092092000 | 2.101904000  | -2.012041000 |
| 6 | -2.291839000 | 1.086365000  | -2.517029000 |
| 6 | -1.019181000 | 0.853558000  | -1.996200000 |
| 6 | 7.558919000  | 0.239322000  | -0.952750000 |
| 6 | 7.555517000  | -0.838151000 | -1.788497000 |
| 6 | 8.560366000  | -0.941381000 | -2.801532000 |
| 6 | 6.616239000  | -1.912431000 | -1.759569000 |
| 6 | -3.366472000 | 4.010924000  | -0.360056000 |

|   |              |              |              |
|---|--------------|--------------|--------------|
| 6 | -4.612898000 | 4.503399000  | -0.611182000 |
| 6 | -5.092462000 | 5.611428000  | 0.156563000  |
| 6 | -5.523872000 | 4.012981000  | -1.594661000 |
| 6 | -4.052404000 | -3.810416000 | -0.137266000 |
| 6 | -5.270818000 | -4.096260000 | -0.678503000 |
| 6 | -6.488409000 | -3.400270000 | -0.412831000 |
| 6 | -5.386789000 | -5.181381000 | -1.603859000 |
| 7 | 9.369111000  | -1.030288000 | -3.621715000 |
| 7 | 5.869546000  | -2.794252000 | -1.761584000 |
| 7 | -6.284938000 | 3.641311000  | -2.380551000 |
| 7 | -5.484454000 | 6.505510000  | 0.774306000  |
| 7 | -7.490907000 | -2.858798000 | -0.220916000 |
| 7 | -5.486582000 | -6.055767000 | -2.352279000 |
| 1 | -1.579214000 | -3.474544000 | 0.687263000  |
| 1 | -5.549897000 | -1.842430000 | 1.198632000  |
| 1 | -4.652374000 | -0.207500000 | 2.780668000  |
| 1 | -2.227250000 | -0.185401000 | 3.337485000  |
| 1 | 5.348646000  | -1.121229000 | 0.160475000  |
| 1 | 7.787253000  | 2.436837000  | 0.440430000  |
| 1 | 6.396683000  | 3.218134000  | 2.325341000  |



|   |              |              |              |
|---|--------------|--------------|--------------|
| 1 | 4.486220000  | 1.825679000  | 3.118585000  |
| 1 | -0.944150000 | 3.290206000  | 0.360530000  |
| 1 | -4.070930000 | 2.257396000  | -2.440349000 |
| 1 | -2.657412000 | 0.468824000  | -3.327758000 |
| 1 | -0.386525000 | 0.069658000  | -2.392854000 |
| 1 | 8.355288000  | 0.951184000  | -1.142659000 |
| 1 | -2.834563000 | 4.527611000  | 0.431890000  |
| 1 | -3.251135000 | -4.459564000 | -0.474590000 |

## References:

- [1] G. Özdemir, H. Yüksek, S. Manap, Ö. Gürsoy-Kol, Potentiometric Titrations of New 1,3,5- Tri- { 4 - [ ( 3-alkyl / aryl- 4, 5-dihydro - 1H -1, 2, 4- triazole -5 -one - 4- yl) - azomethin] phenoxy carbonyl} Benzenes. *Pharma. Chem. J.*, 2018, **5**, 23-28
- [2] L. Xu, S.-Y. Ding, J. Liu, J. Sun, W. Wang, Q.-Y. Zheng, Highly Crystalline Covalent Organic Frameworks From Flexible Building Blocks. *Chem. Commun.*, 2016, **52**, 4706-4709
- [3] M. Karimi, A.-R. Karimi, Synthesis of Tri-Arm Star Shaped 1, 3, 5- Triazines Catalysed by 1, 5, 7 -Triazines Catalysed by 1, 5, 7-Triazabicyclo[4.4.0]dec-5-ene (TBD). *J. Chil. Chem. Soc.*, 2014, **4**, 2674-2676.
- [4] S.-F. Nelsen, S.-C. Blackstock, Y. Kim, Estimation of Inner Shell Marcus Terms for Amino Nitrogen Compounds by Molecular Orbital Calculations. *J. Am. Chem. Soc.* 1987, **109**, 677–682.
- [5] F. Blomgren, S. Larsson, S.-F. Nelsen, Electron Transfer in Bis(Hydrazines), a Critical Test for Application of the Marcus Model. *J. Comput. Chem.* 2001, **22**, 655–664.
- [6] S.-F. Nelsen, F. Blomgren, Estimation of Electron Transfer Parameters from AM1 Calculations. *J. Org. Chem.* 2001, **66**, 6551–6559.
- [7] E. Varathan, D. Vijay, P. Shyam, V. Kumar, V. Subramanian, Computational Design of High Triplet Energy Host Materials for Phosphorescent Blue Emitters. *J. Mater. Chem. C* 2013, **1**, 4261–4274.
- [8] M.-K. Yan, Y. Tao, R.-F. Chen, C. Zheng, Z.-F. An, W. Huang, Computational Design and Selection of Optimal Building Blocks and Linking Topologies for Construction of High-Performance Host Materials. *RSC Adv.* 2012, **2**, 7860–7867.

[9] G.-W. Kim, Y.-H. Son, H.-I. Yang, J.-H. Park, I.-J. Ko, R. Lampande, J. Sakong, M.-J. Maeng, J.-A. Hong, J.-Y. Lee, Y. Park, J.-H. Kwon, Diphenanthroline Electron Transport Materials for the Efficient Charge Generation Unit in Tandem Organic Light-Emitting Diodes. *Chem. Mater.* 2017, **29**, 8299–8312. <https://doi.org/10.1021/acs.chemmater.7b02655>.
